# Supplementary material for: Phenolic constituents from twigs of Aleurites fordii and their biological activities
Source: publisher site journal article supplement (doi:10.3762/bjoc.17.151), 2021-09-07
Supplement: Additional file 1 [file 1860-5397-17-151-S1.pdf]

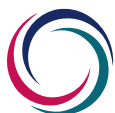

## Supporting Information

for

### **Phenolic constituents from twigs of *Aleurites fordii* and their biological activities**

Kyoung Jin Park, Won Se Suh, Da Hye Yoon, Chung Sub Kim, Sun Yeou Kim  
and Kang Ro Lee

*Beilstein J. Org. Chem.* **2021**, *17*, 2329–2339. doi:10.3762/bjoc.17.151

**Copies of NMR spectra including 1D and 2D NMR and HRMS  
data of compounds 1–3, 15, and 16 and ECD spectra of  
compounds 1–3**

## Contents:

**Figure S1** HRFABMS data of **1**

**Figure S2**  $^1\text{H}$  NMR data of **1** ( $\text{CD}_3\text{OD}$ , 700 MHz)

**Figure S3**  $^{13}\text{C}$  NMR data of **1** ( $\text{CD}_3\text{OD}$ , 175 MHz)

**Figure S4**  $^1\text{H}$ - $^1\text{H}$  COSY data of **1** ( $\text{CD}_3\text{OD}$ )

**Figure S5** HSQC data of **1** ( $\text{CD}_3\text{OD}$ )

**Figure S6** HMBC data of **1** ( $\text{CD}_3\text{OD}$ )

**Figure S7** ECD data of **1**

**Figure S8** HRESIMS data of **2**

**Figure S9**  $^1\text{H}$  NMR data of **2** ( $\text{CD}_3\text{OD}$ , 500 MHz)

**Figure S10**  $^{13}\text{C}$  NMR data of **2** ( $\text{CD}_3\text{OD}$ , 125 MHz)

**Figure S11**  $^1\text{H}$ - $^1\text{H}$  COSY data of **2** ( $\text{CD}_3\text{OD}$ )

**Figure S12** HSQC data of **2** ( $\text{CD}_3\text{OD}$ )

**Figure S13** HMBC data of **2** ( $\text{CD}_3\text{OD}$ )

**Figure S14** NOESY data of **2** ( $\text{CD}_3\text{OD}$ )

**Figure S15** ECD data of **2**

**Figure S16** HRESIMS data of **3**

**Figure S17**  $^1\text{H}$  NMR data of **3** ( $\text{CD}_3\text{OD}$ , 700 MHz)

**Figure S18**  $^{13}\text{C}$  NMR data of **3** ( $\text{CD}_3\text{OD}$ , 175 MHz)

**Figure S19**  $^1\text{H}$ - $^1\text{H}$  COSY data of **3** ( $\text{CD}_3\text{OD}$ )

**Figure S20** HSQC data of **3** ( $\text{CD}_3\text{OD}$ )

**Figure S21** HMBC data of **3** ( $\text{CD}_3\text{OD}$ )

**Figure S22** ECD data of **3**

**Figure S23** HRESIMS data of **15**

**Figure S24**  $^1\text{H}$  NMR data of **15** ( $\text{CD}_3\text{OD}$ , 700 MHz)

**Figure S25**  $^{13}\text{C}$  NMR data of **15** ( $\text{CD}_3\text{OD}$ , 175 MHz)

**Figure S26**  $^1\text{H}$ - $^1\text{H}$  COSY data of **15** ( $\text{CD}_3\text{OD}$ )

**Figure S27** HSQC data of **15** ( $\text{CD}_3\text{OD}$ )

**Figure S28** HMBC data of **15** ( $\text{CD}_3\text{OD}$ )

**Figure S29** HRESIMS data of **16**

**Figure S30**  $^1\text{H}$  NMR data of **16** ( $\text{CD}_3\text{OD}$ , 500 MHz)

**Figure S31**  $^{13}\text{C}$  NMR data of **16** ( $\text{CD}_3\text{OD}$ , 125 MHz)

**Figure S32**  $^1\text{H}$ - $^1\text{H}$  COSY data of **16** ( $\text{CD}_3\text{OD}$ )

**Figure S33** HSQC data of **16** ( $\text{CD}_3\text{OD}$ )

**Figure S34** HMBC data of **16** ( $\text{CD}_3\text{OD}$ )

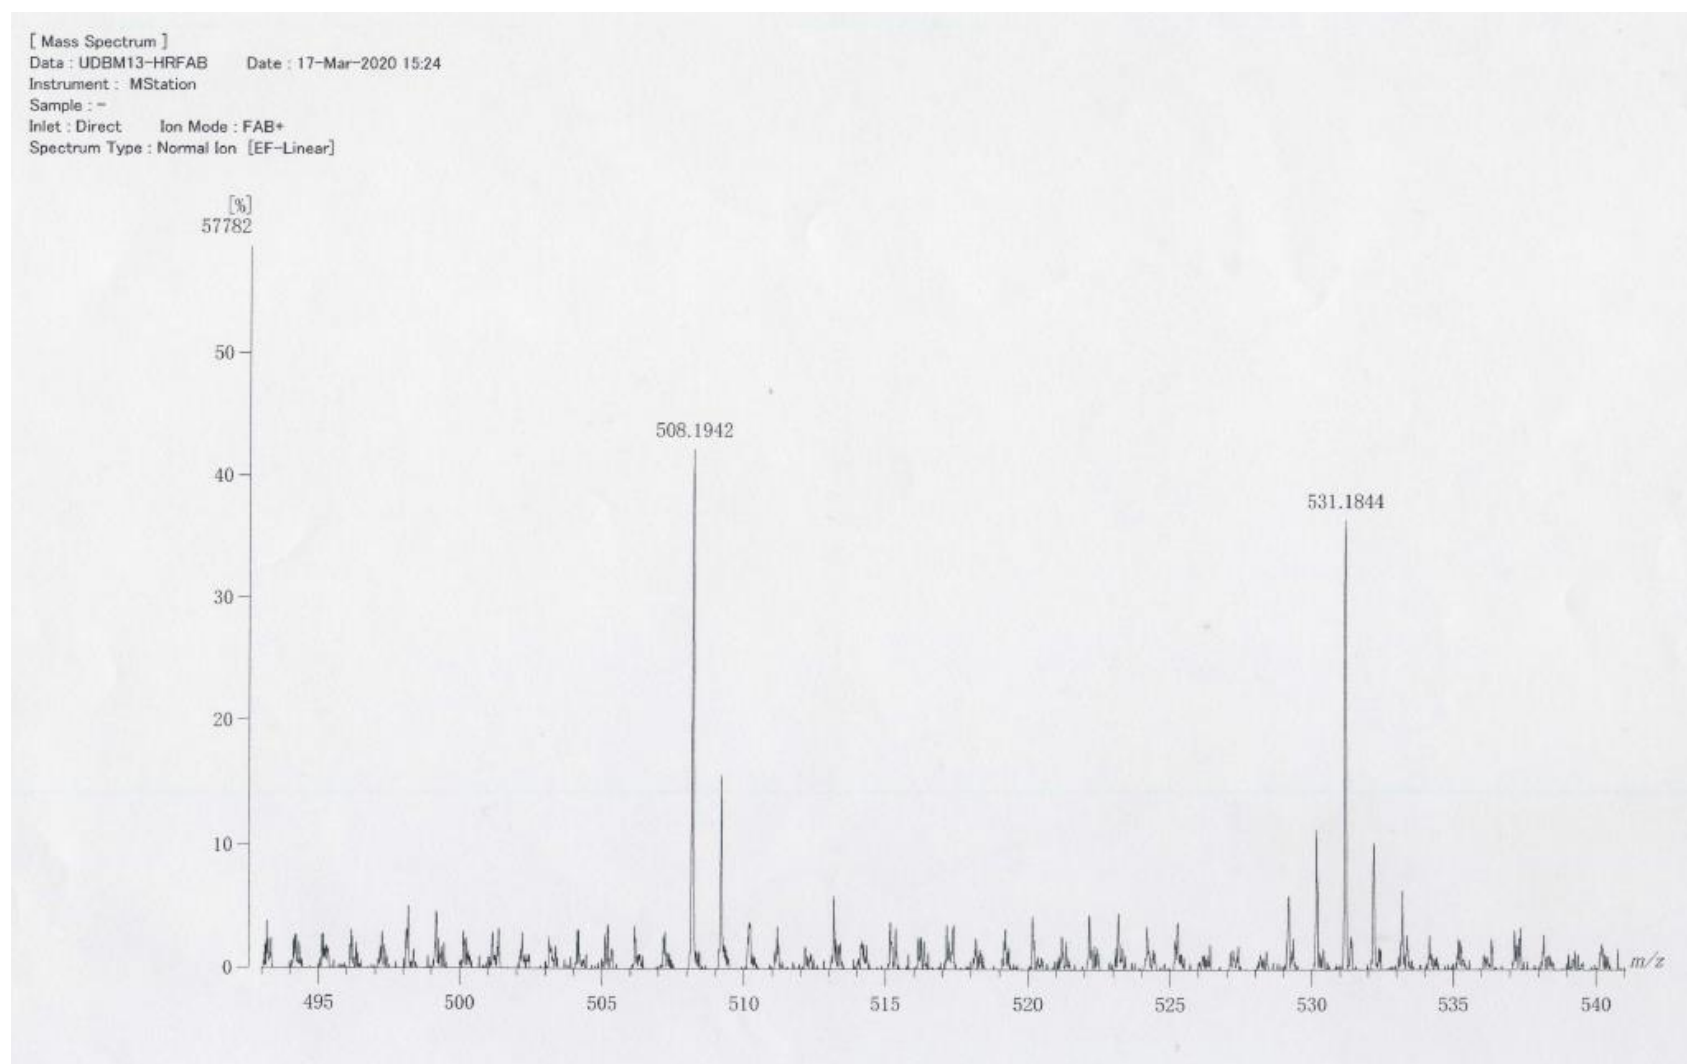

**Figure S1** HRFABMS data of **1**



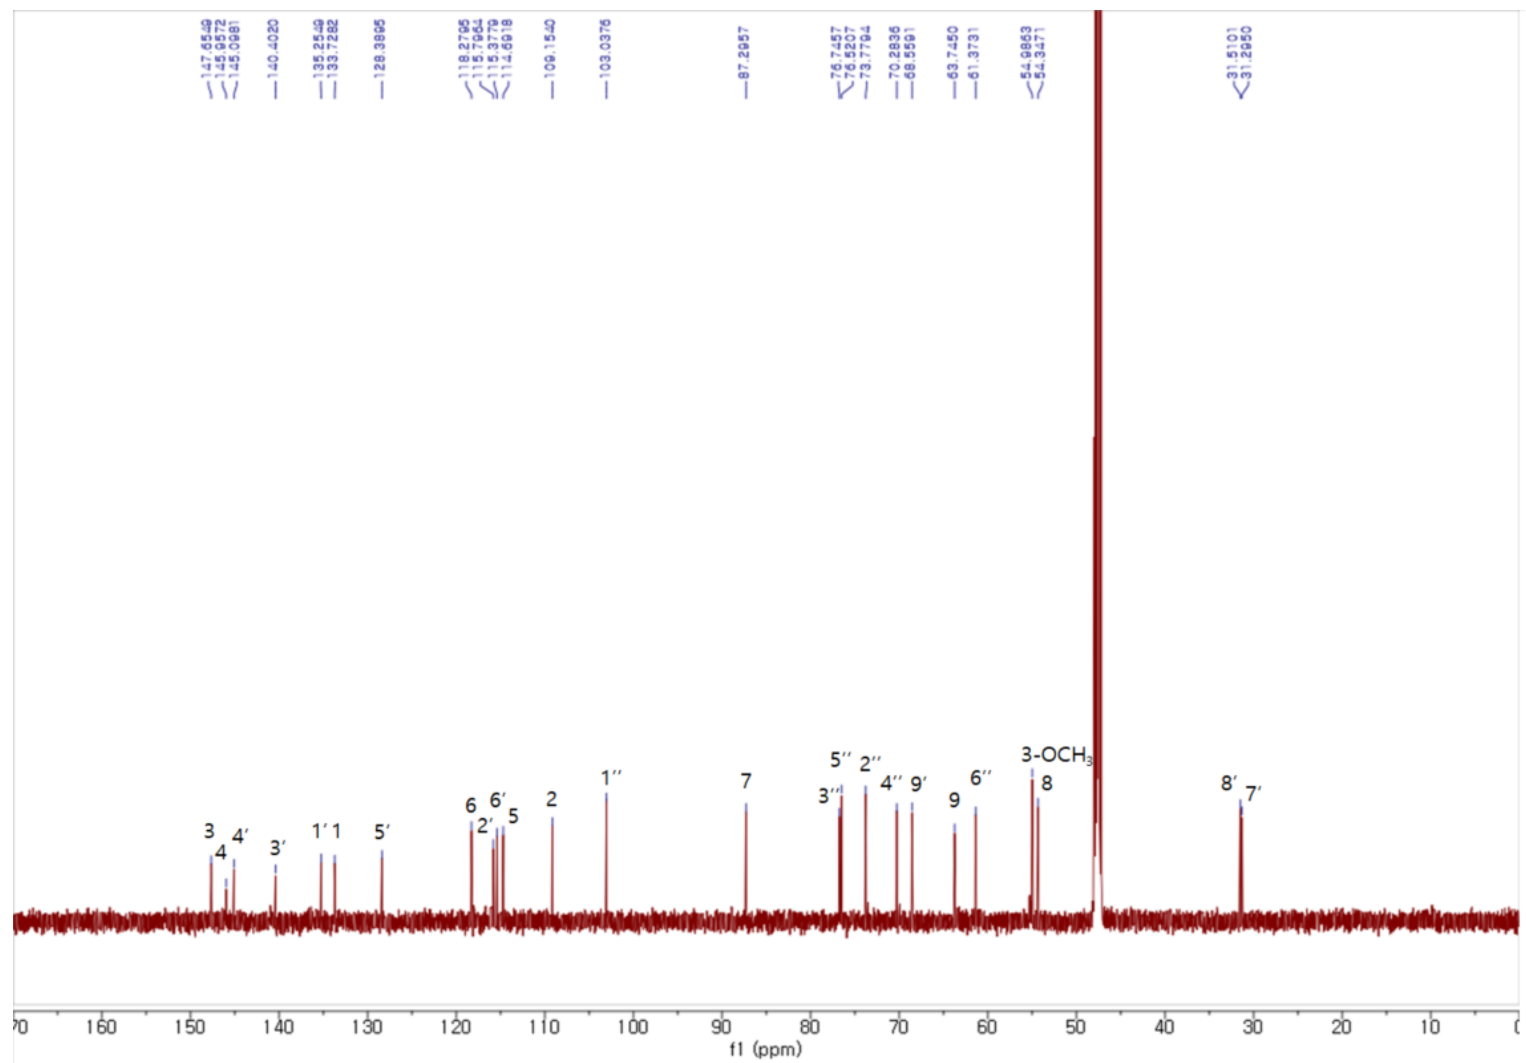

**Figure S3**  $^{13}\text{C}$  NMR data of **1** ( $\text{CD}_3\text{OD}$ , 175 MHz)

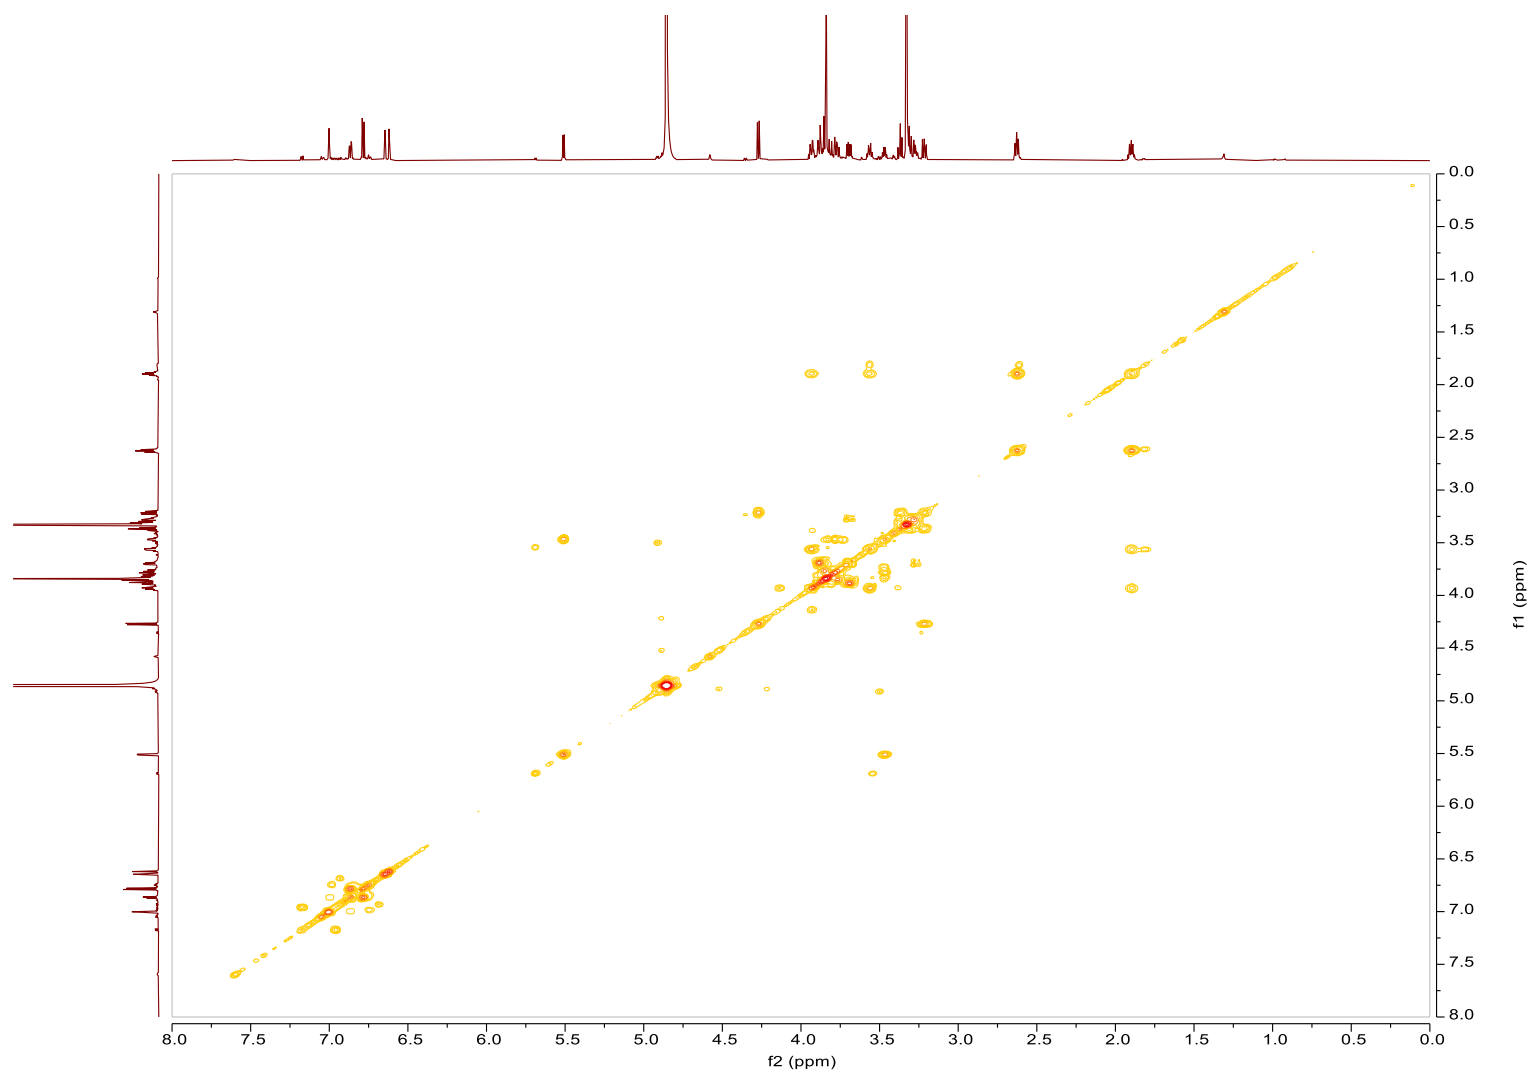

**Figure S4**  $^1\text{H}$ - $^1\text{H}$  COSY data of **1** ( $\text{CD}_3\text{OD}$ )

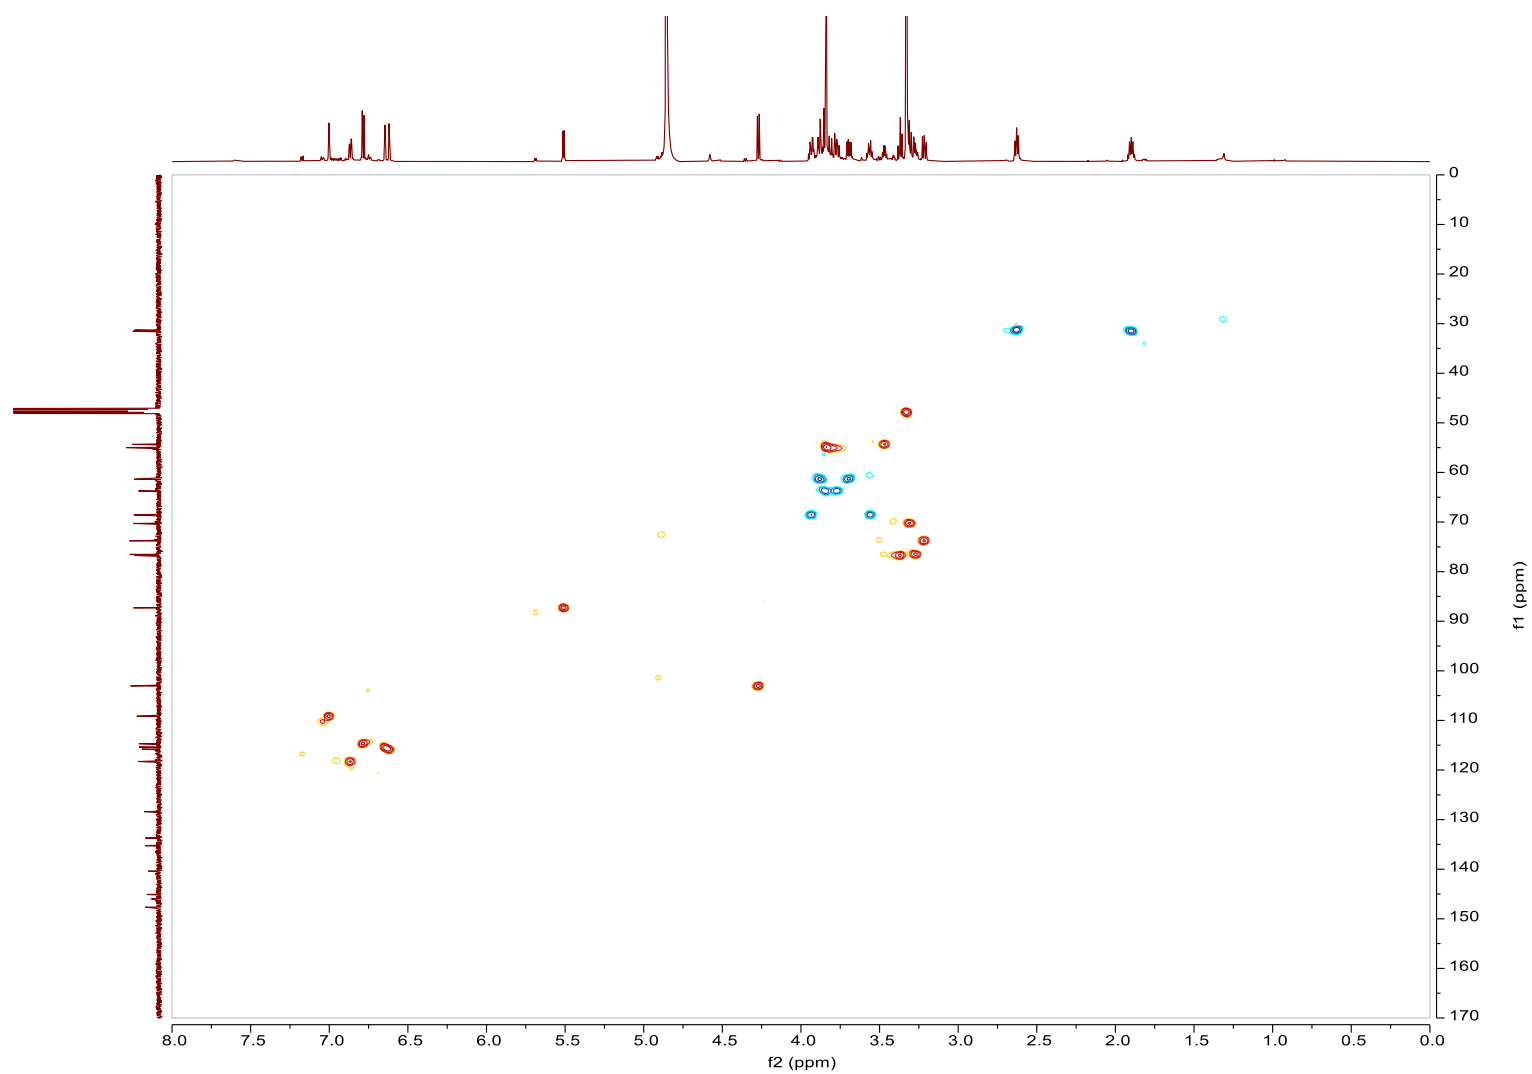

**Figure S5** HSQC data of **1** (CD<sub>3</sub>OD)

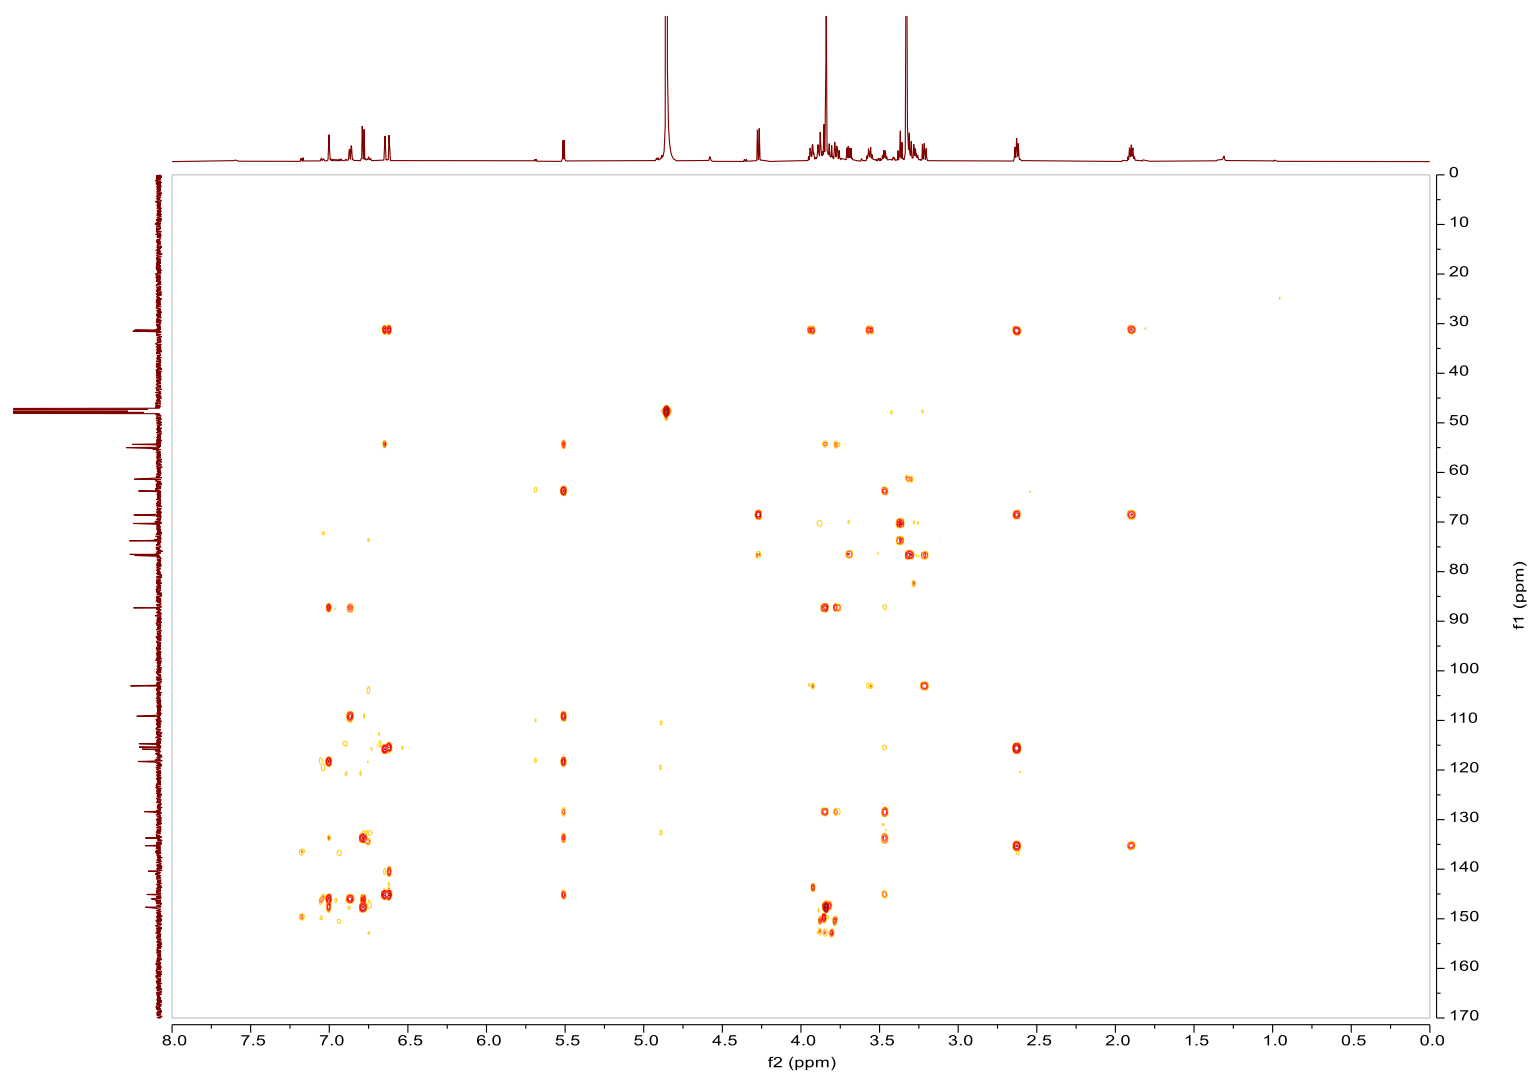

**Figure S6** HMBC data of **1** (CD<sub>3</sub>OD)

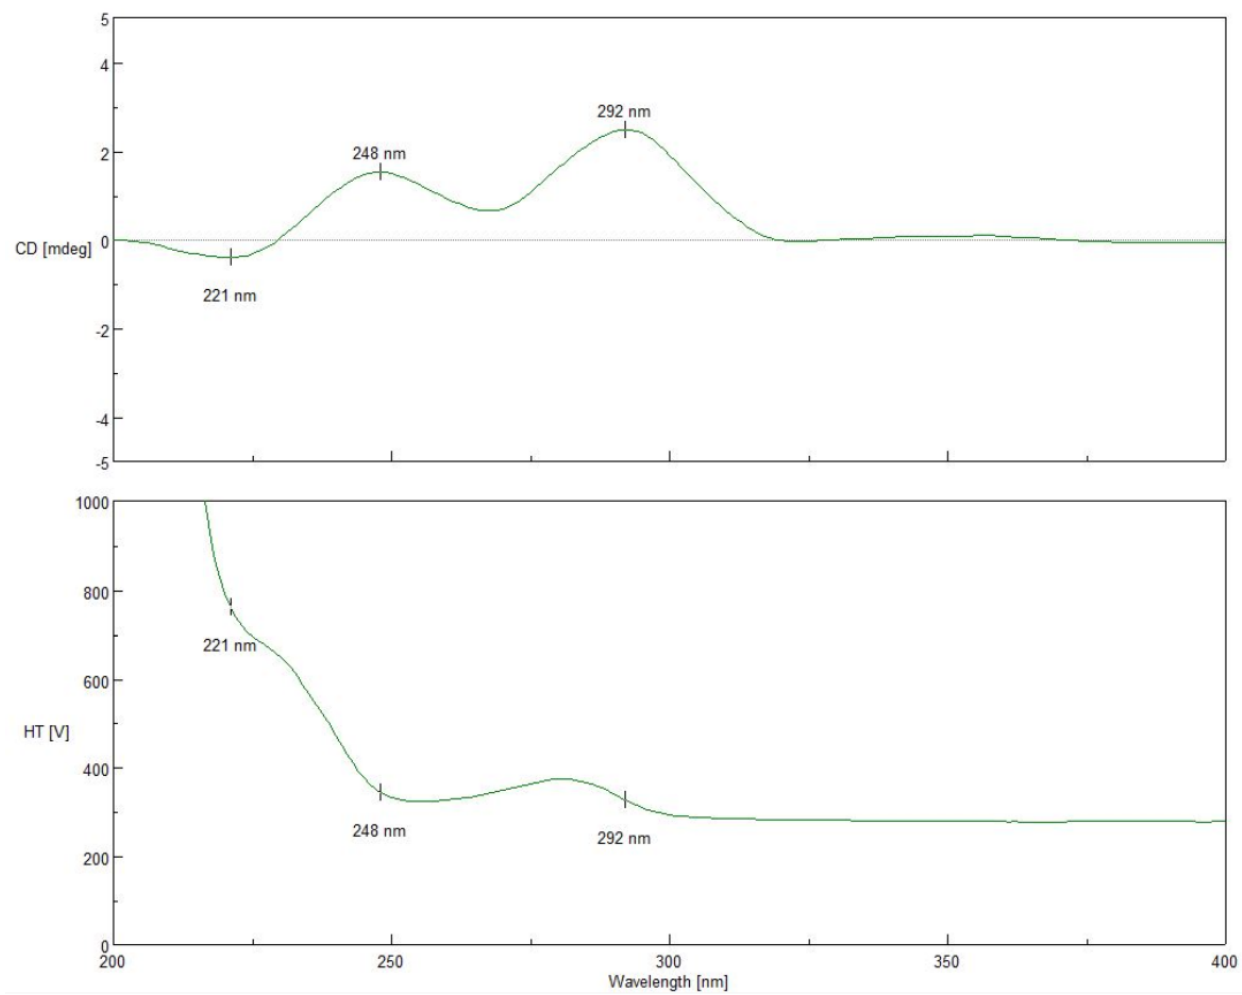

**Figure S7** ECD data of **1**

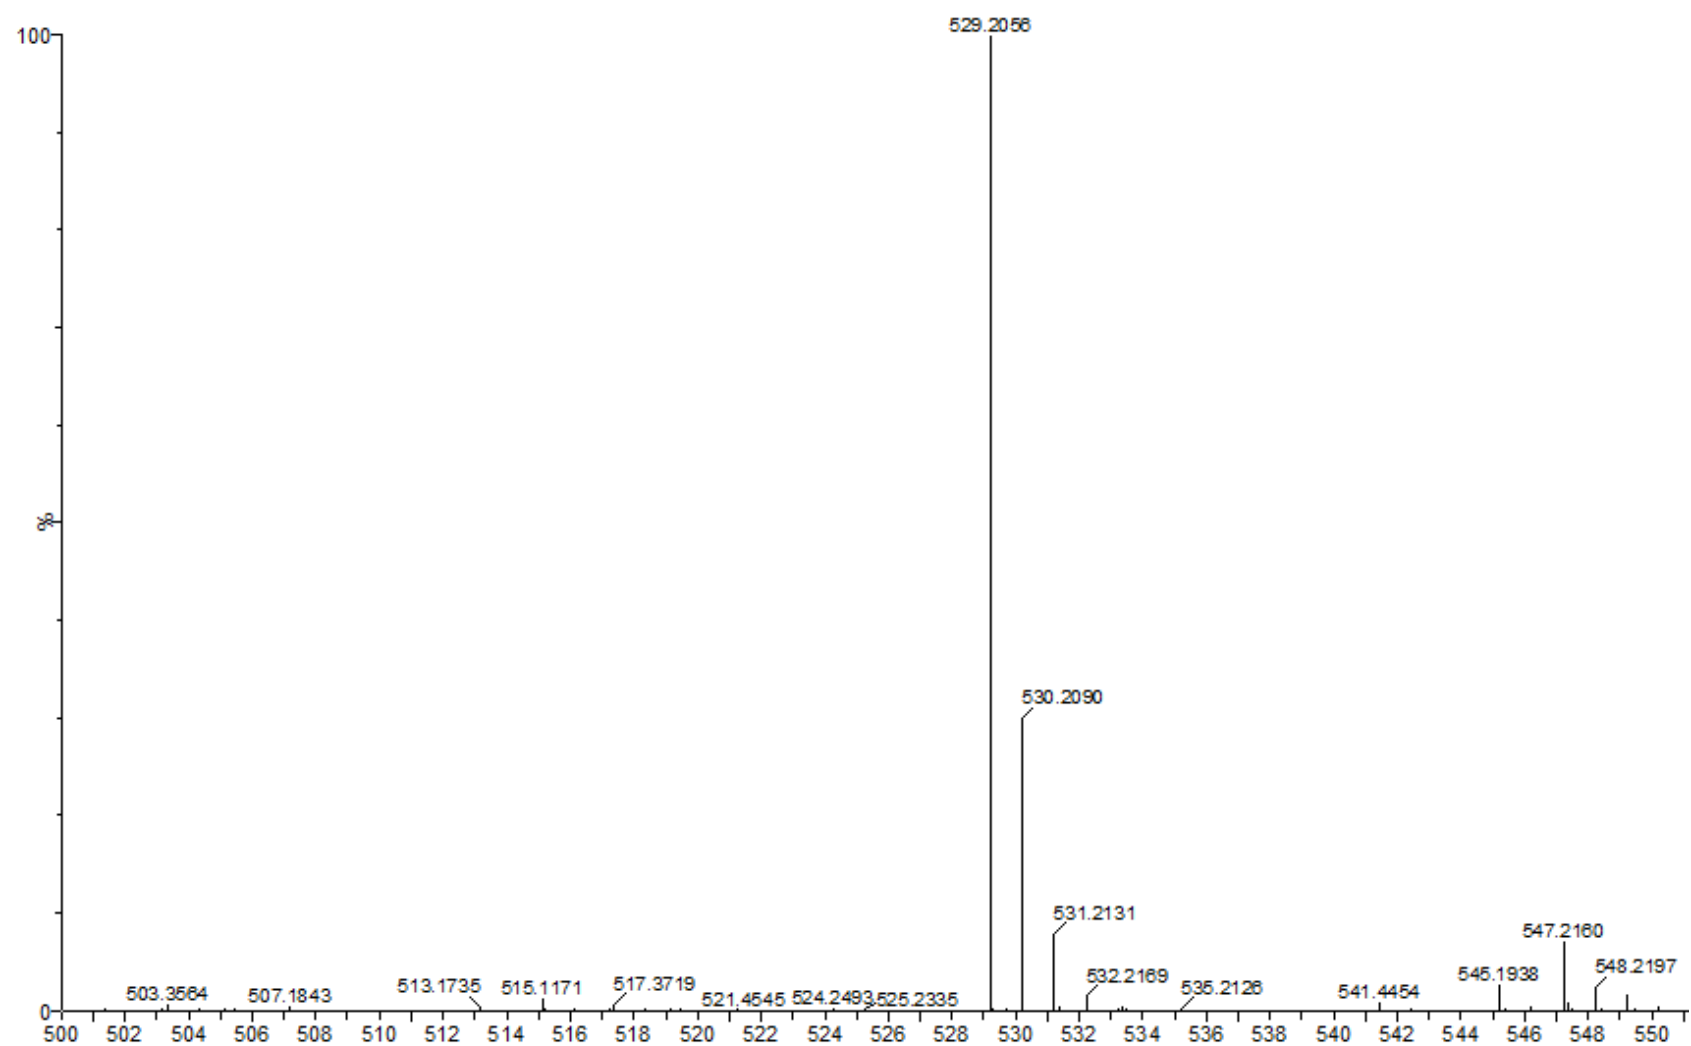

**Figure S8** HRESIMS data of **2**

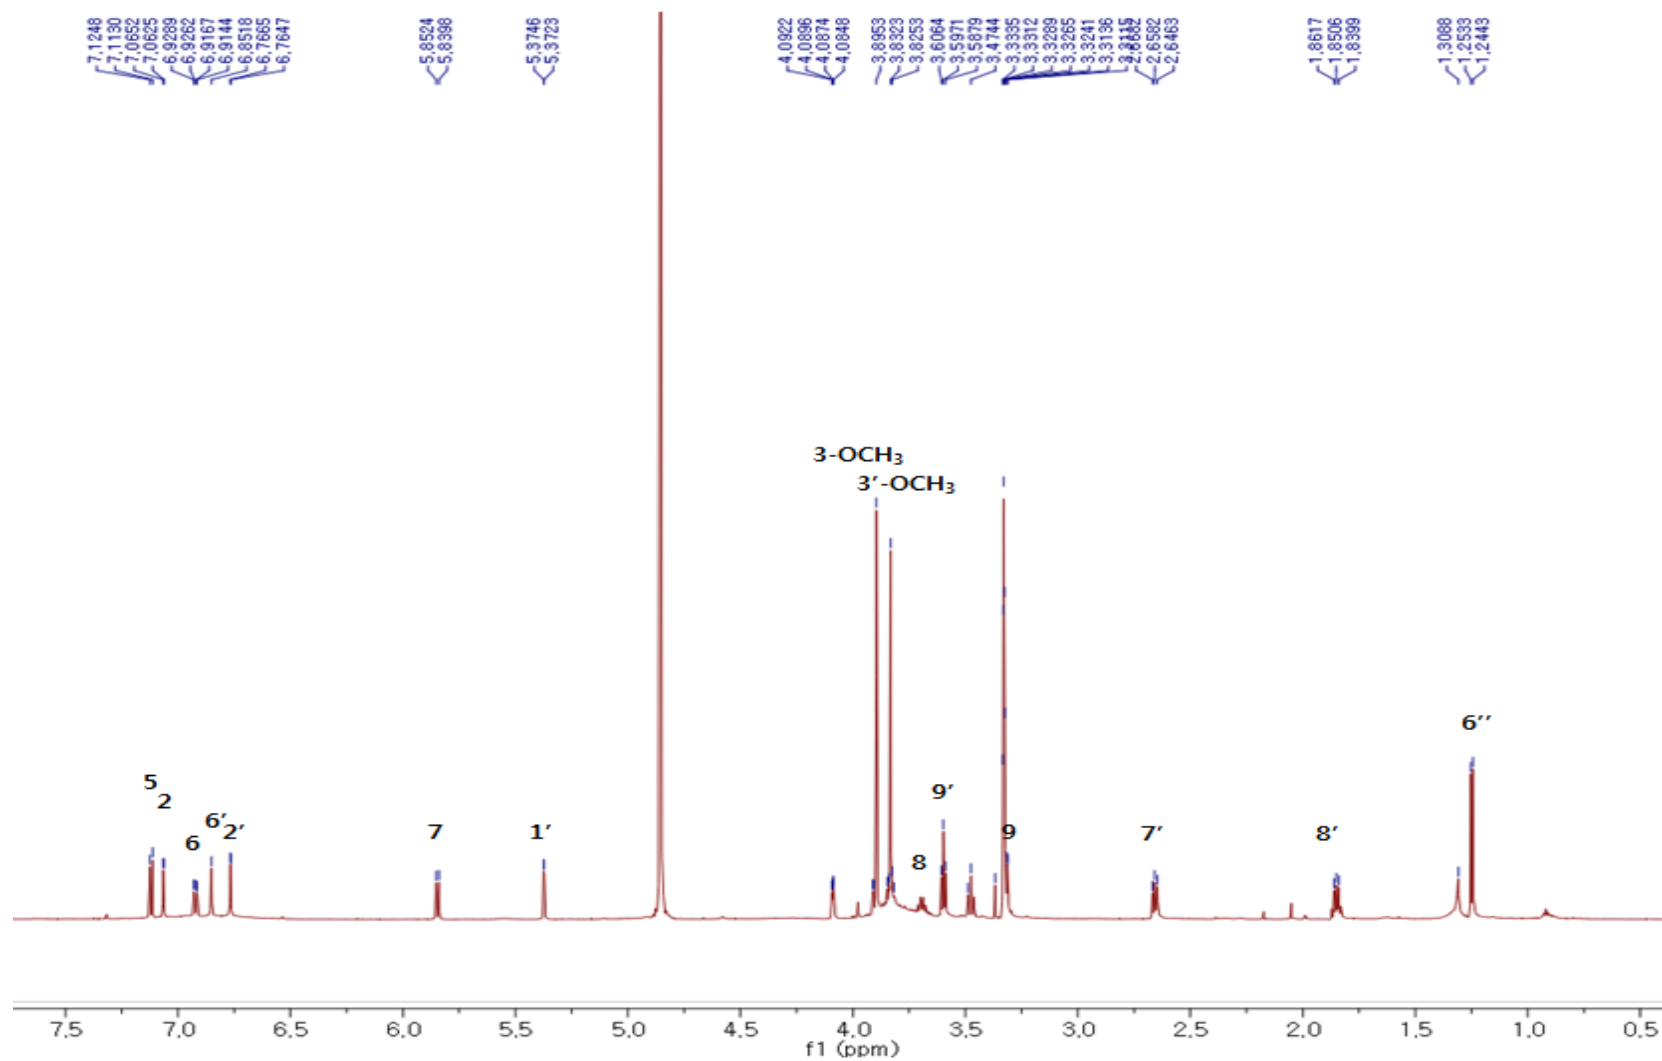

**Figure S9** <sup>1</sup>H NMR data of **2** (CD<sub>3</sub>OD, 500 MHz)

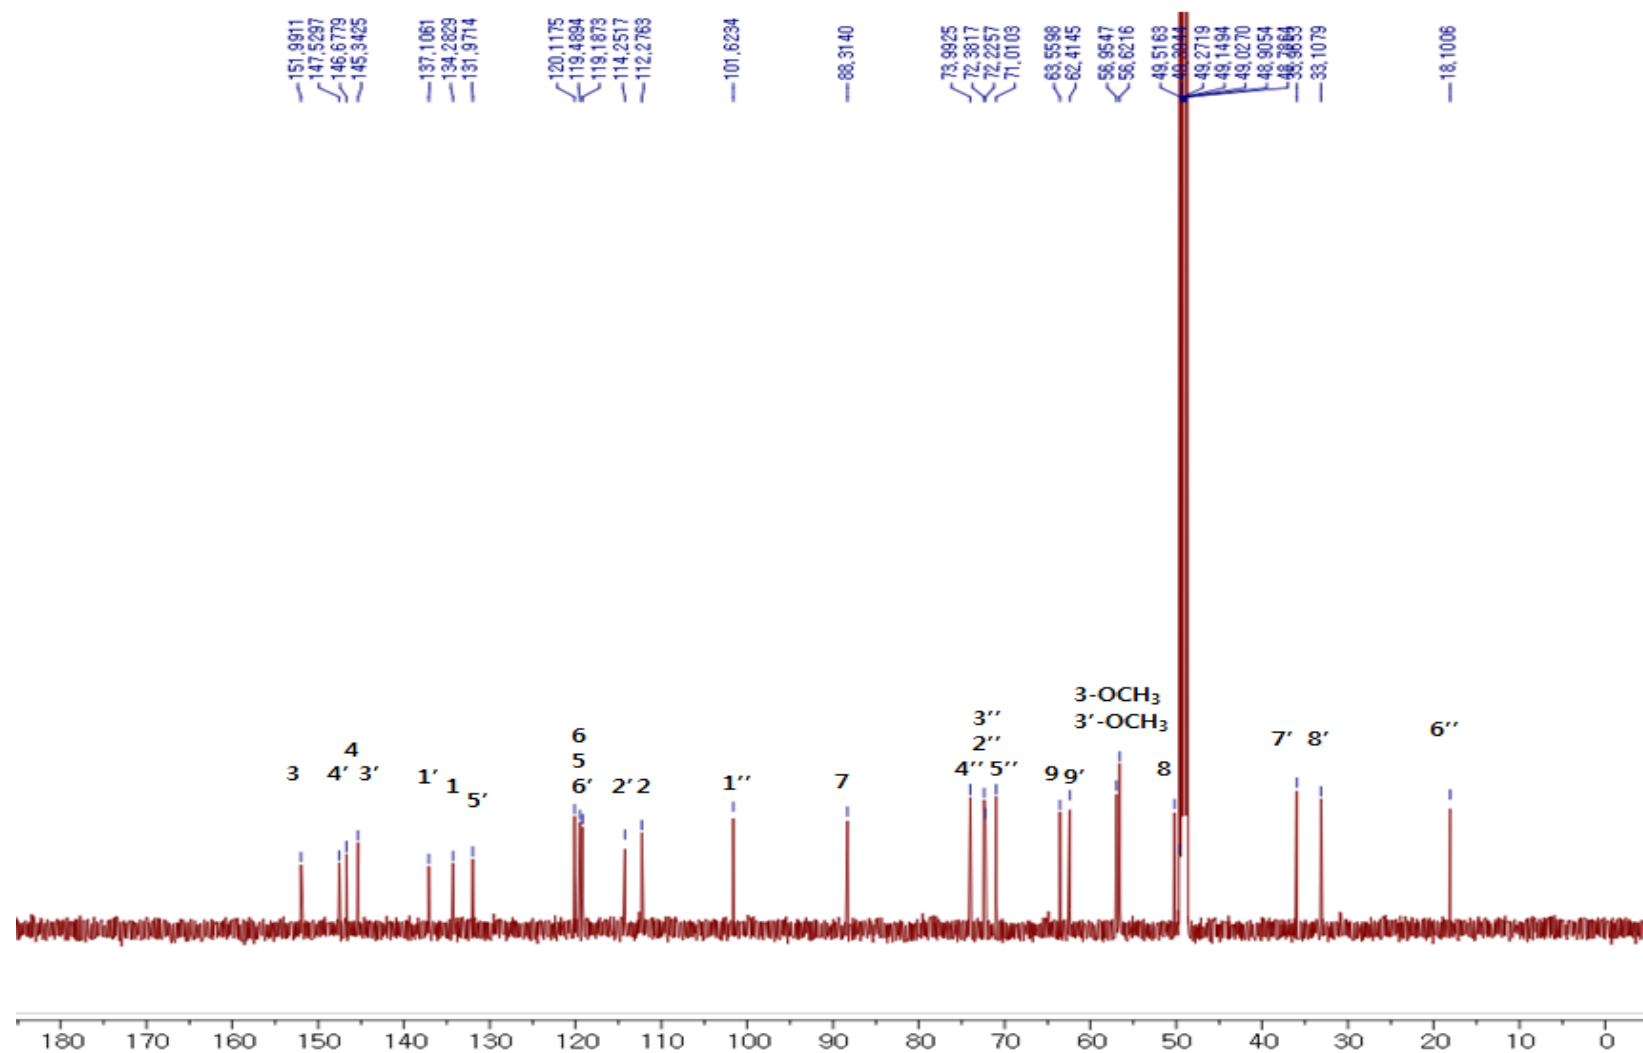

**Figure S10**  $^{13}\text{C}$  NMR data of **2** ( $\text{CD}_3\text{OD}$ , 125 MHz)

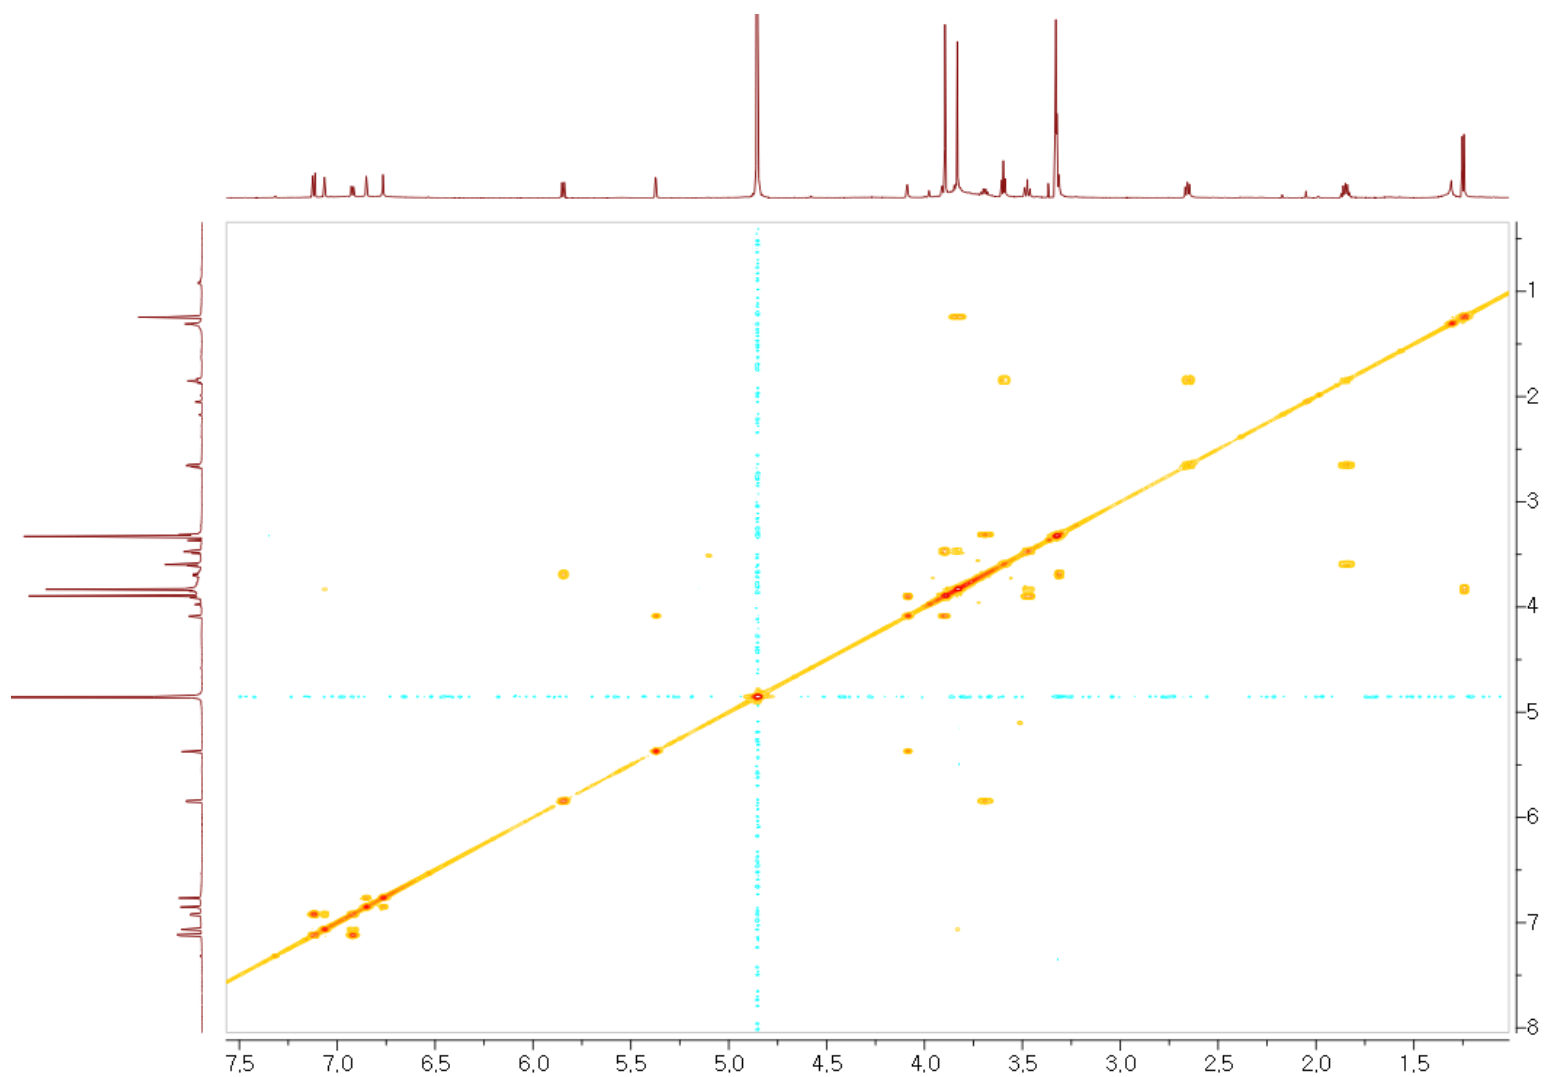

**Figure S11**  $^1\text{H}$ - $^1\text{H}$  COSY data of **2** ( $\text{CD}_3\text{OD}$ )

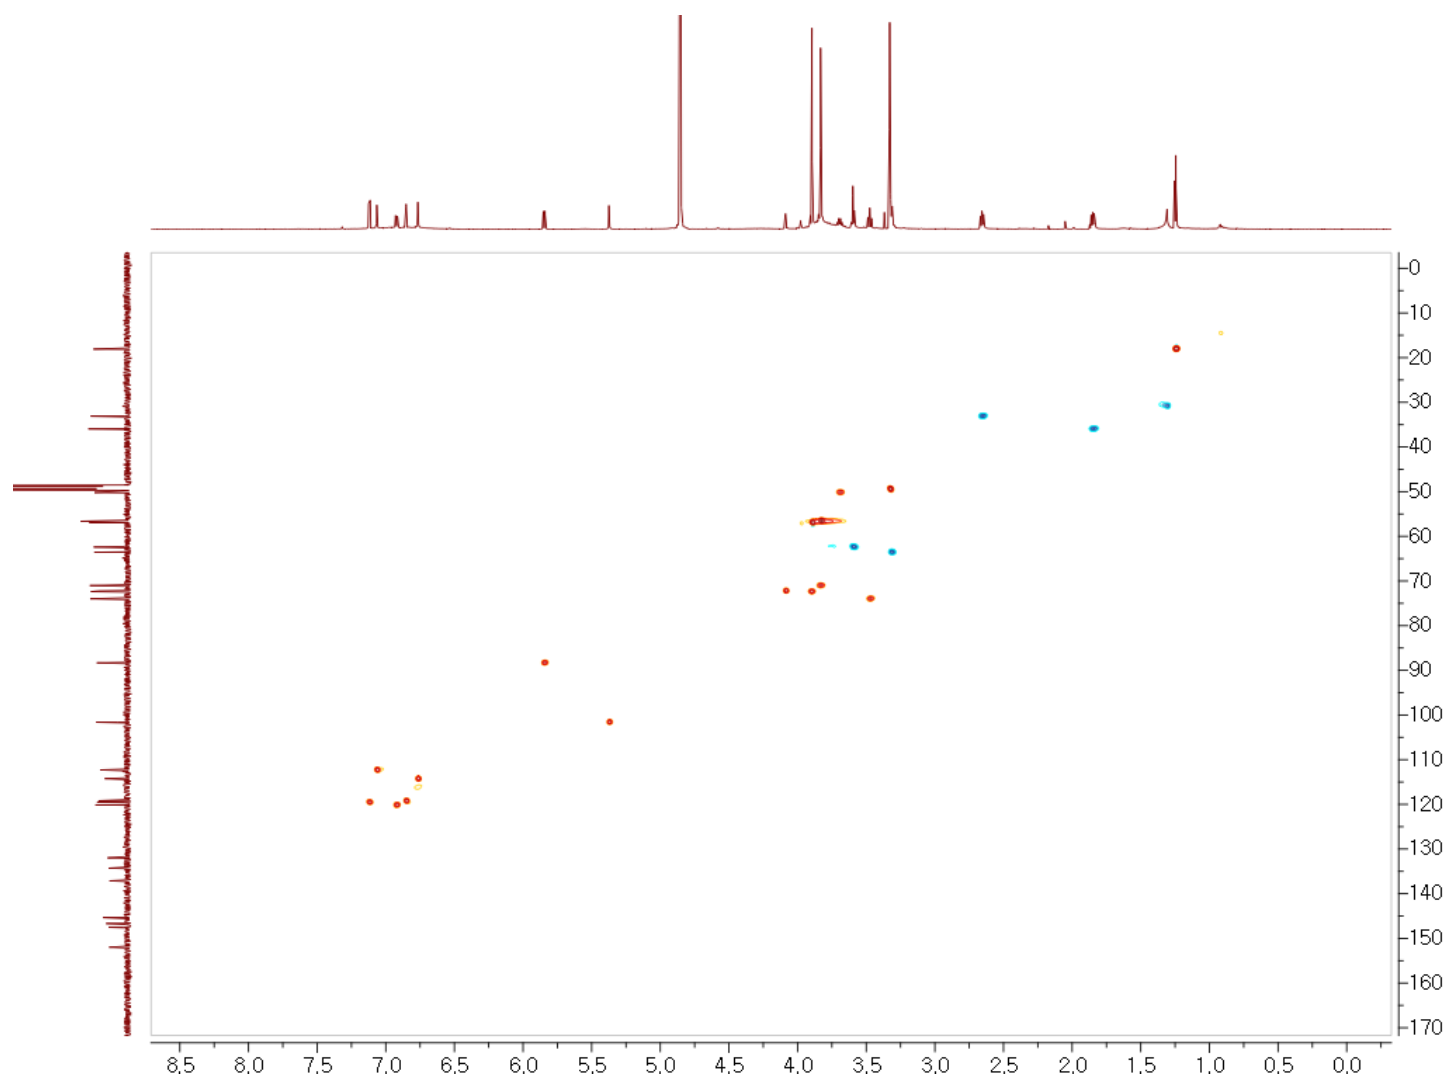

**Figure S12** HSQC data of **2** (CD<sub>3</sub>OD)

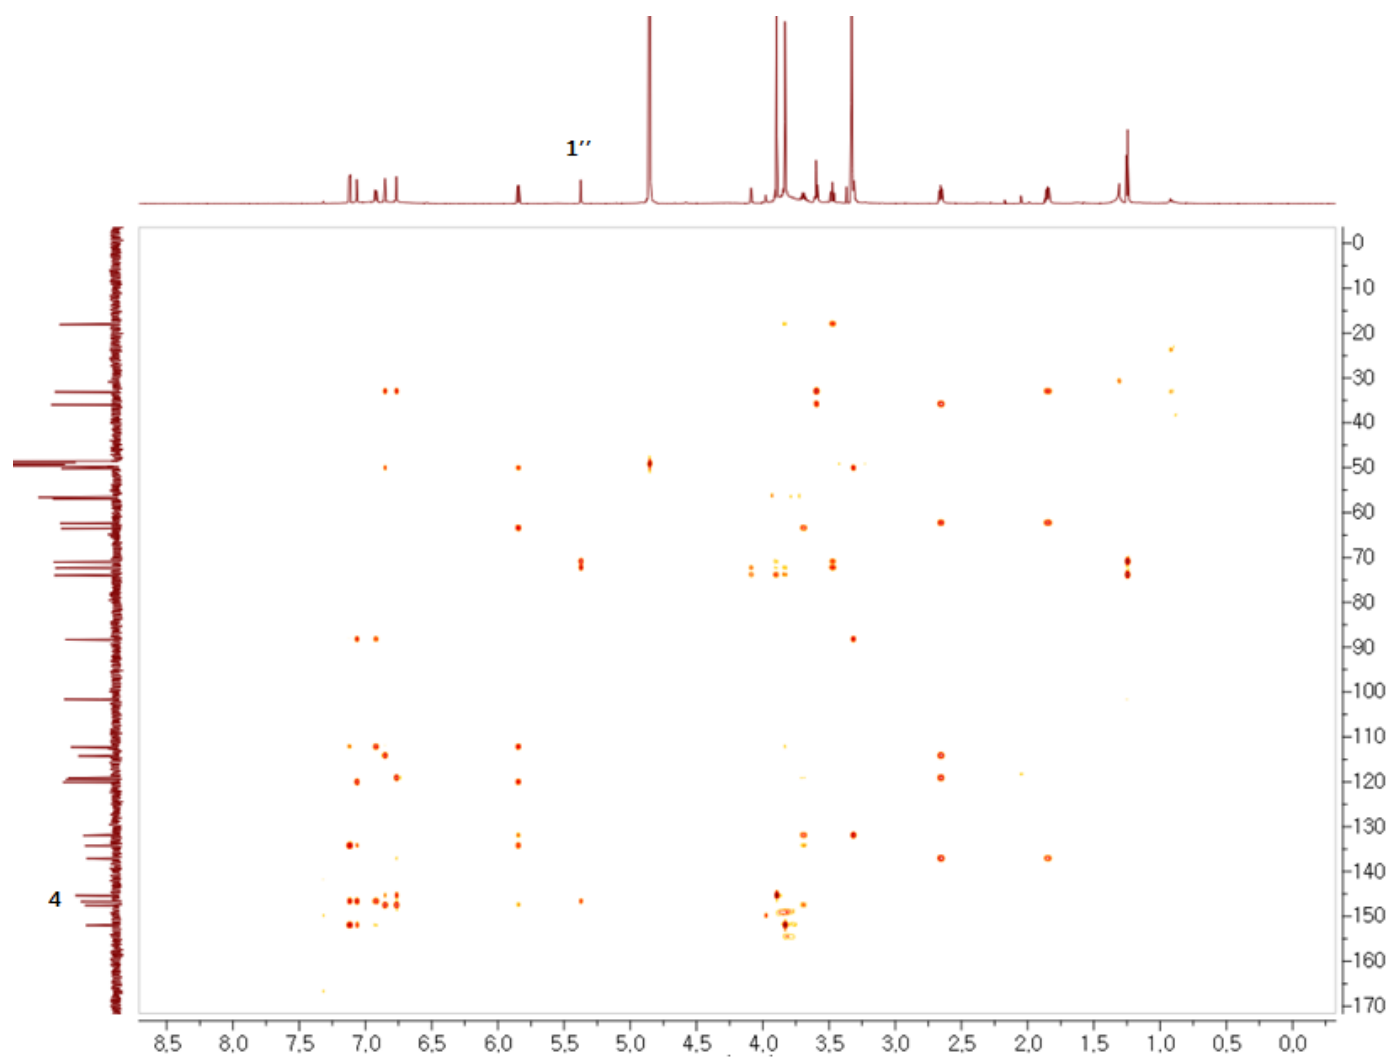

**Figure S13** HMBC data of **2** ( $\text{CD}_3\text{OD}$ )

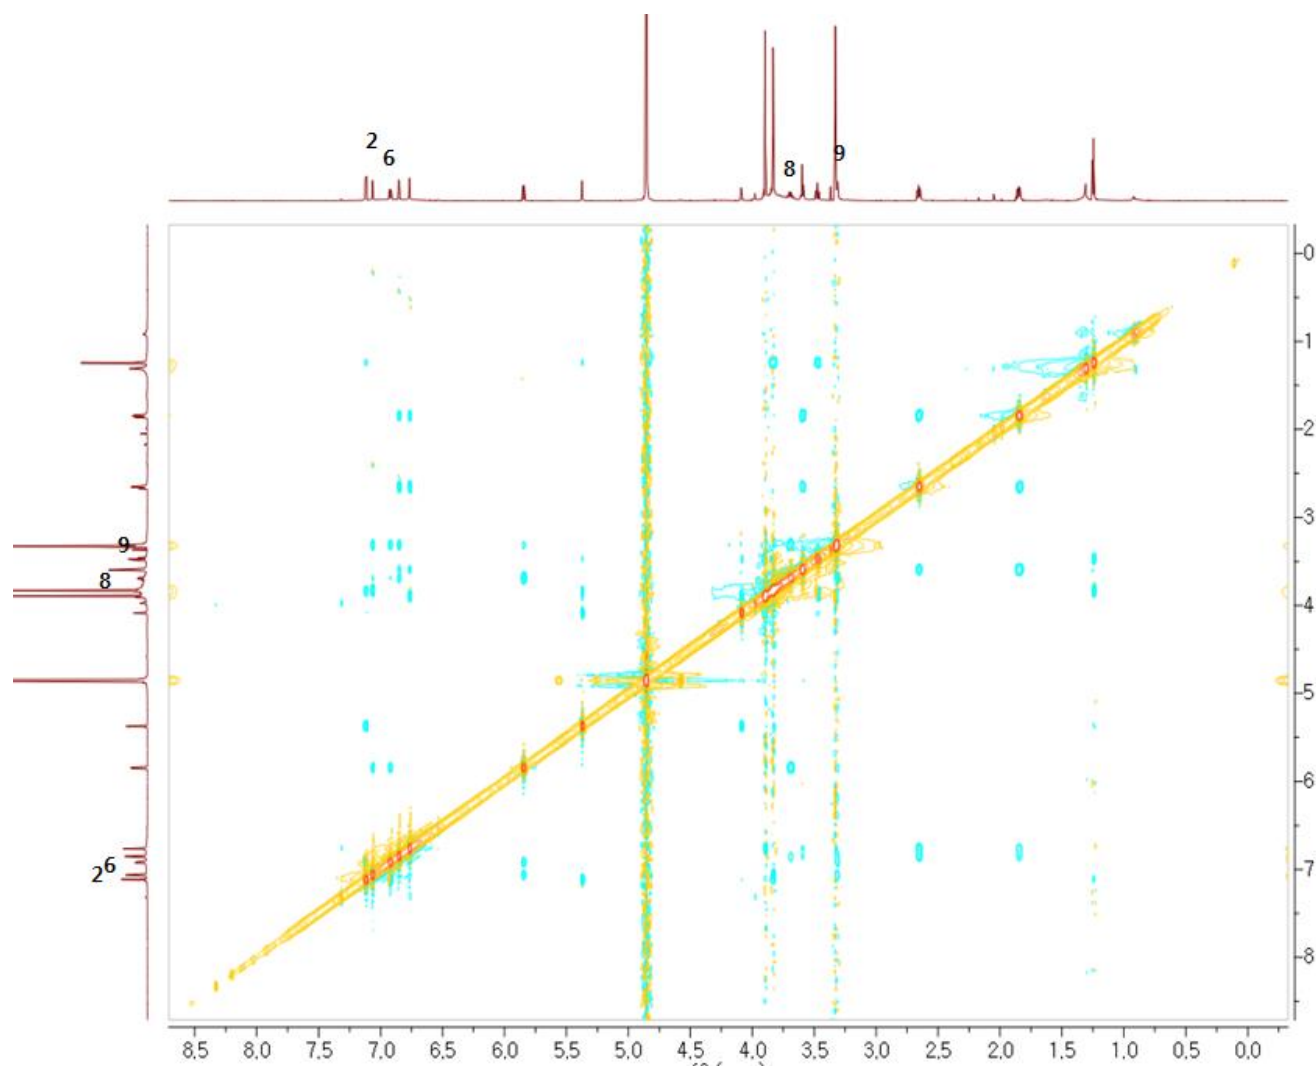

**Figure S14** NOESY data of **2** (CD<sub>3</sub>OD)

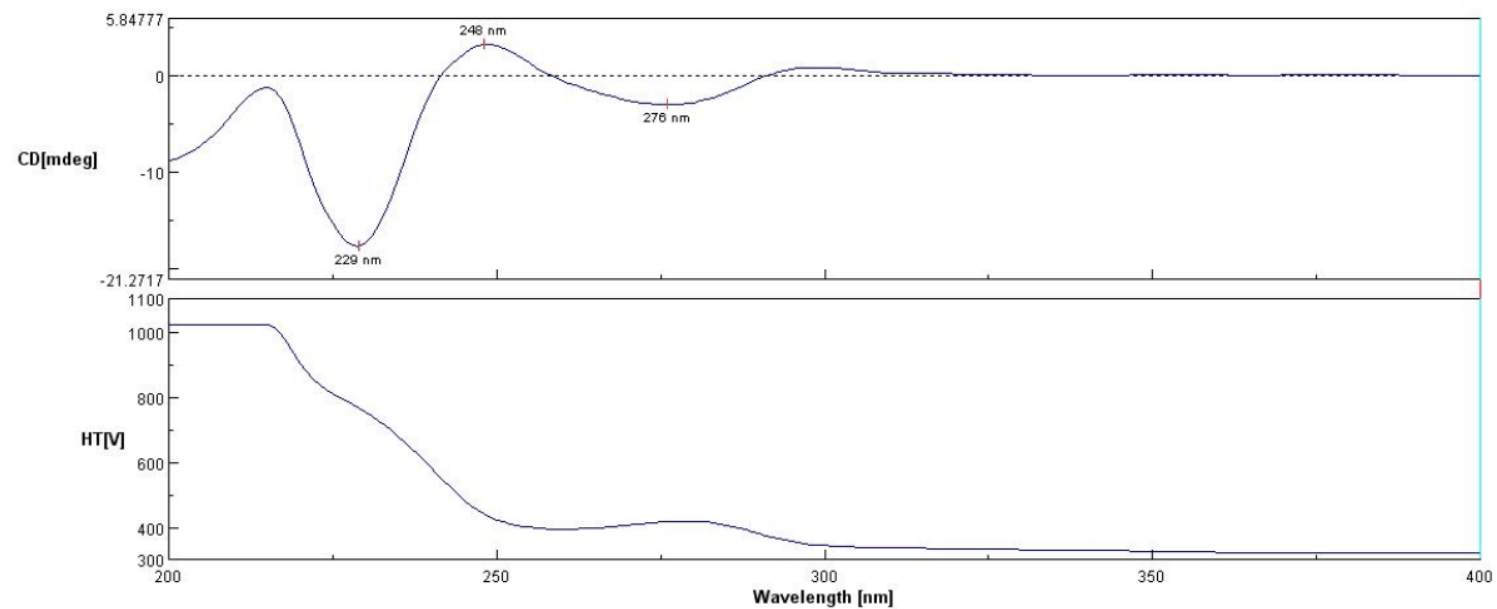

**Figure S15** ECD data of **2**

20200203\_02\_UDBM30\_SKKU\_HRP\_1 10 (0.225) AM2 (Ar,30000.0,0.00,0.00)

1: TOF MS ES+  
2.50e4

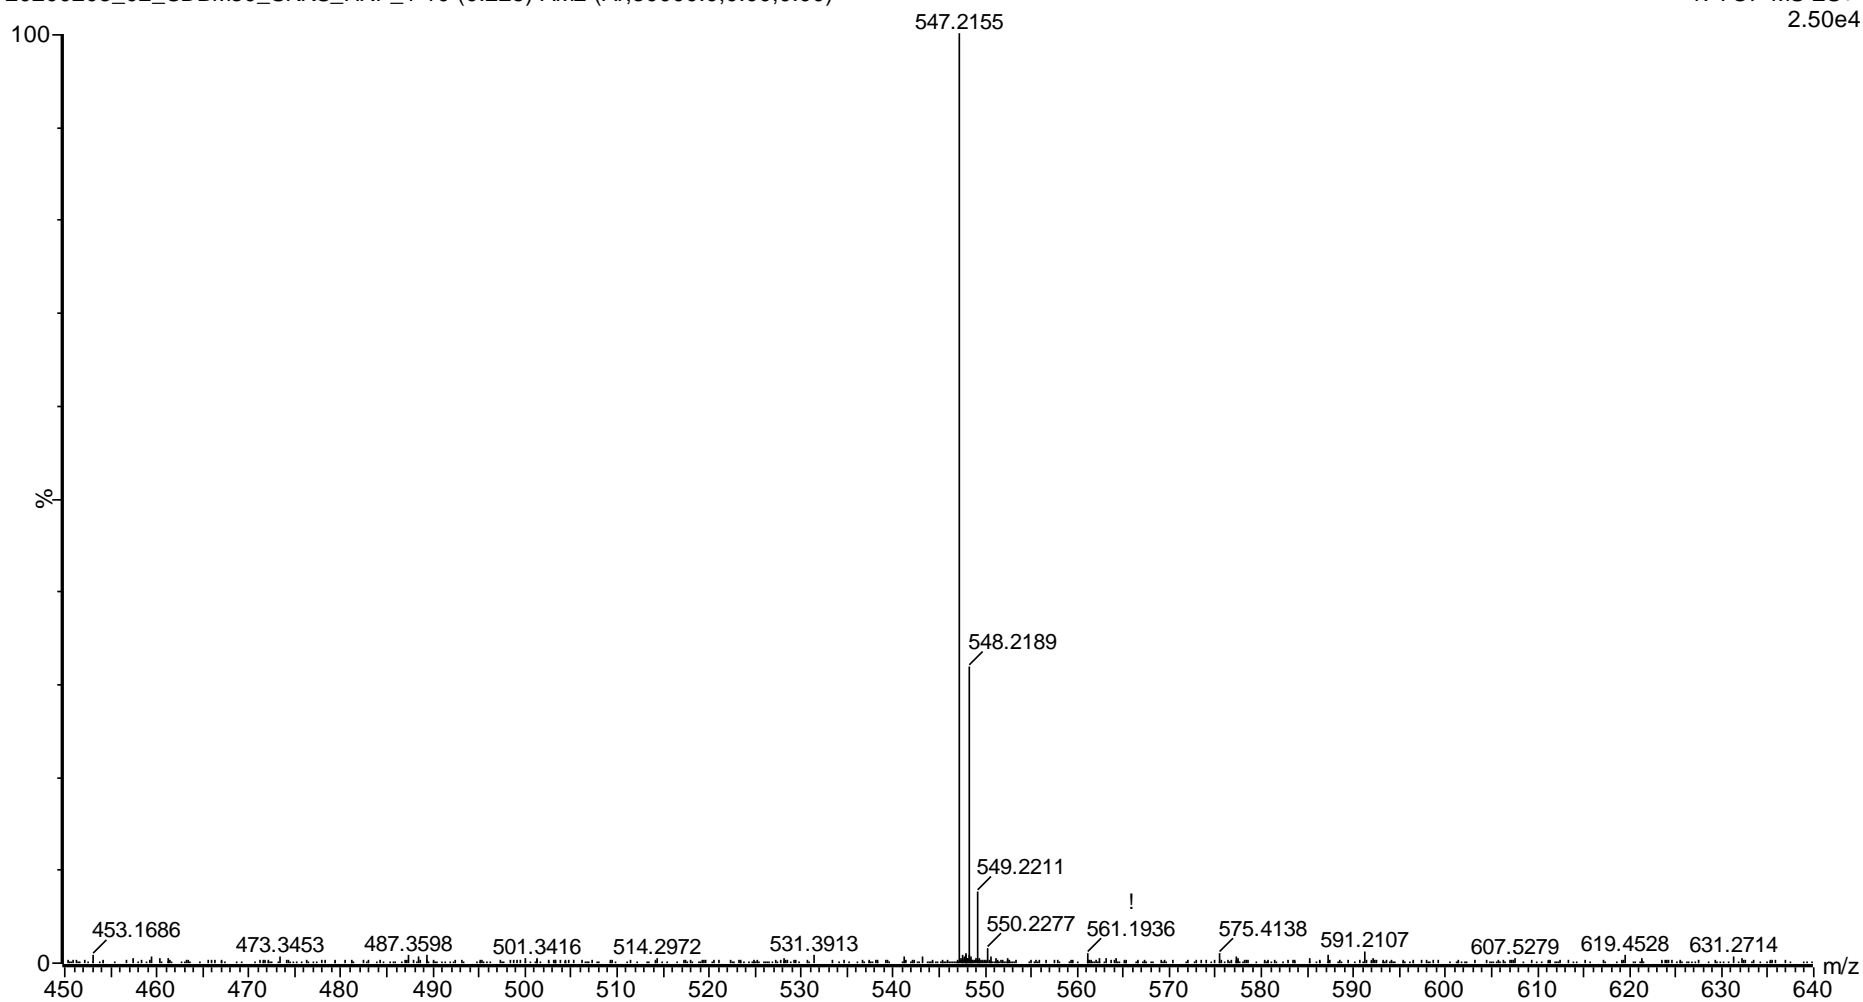

**Figure S16** HRESIMS data of **3**

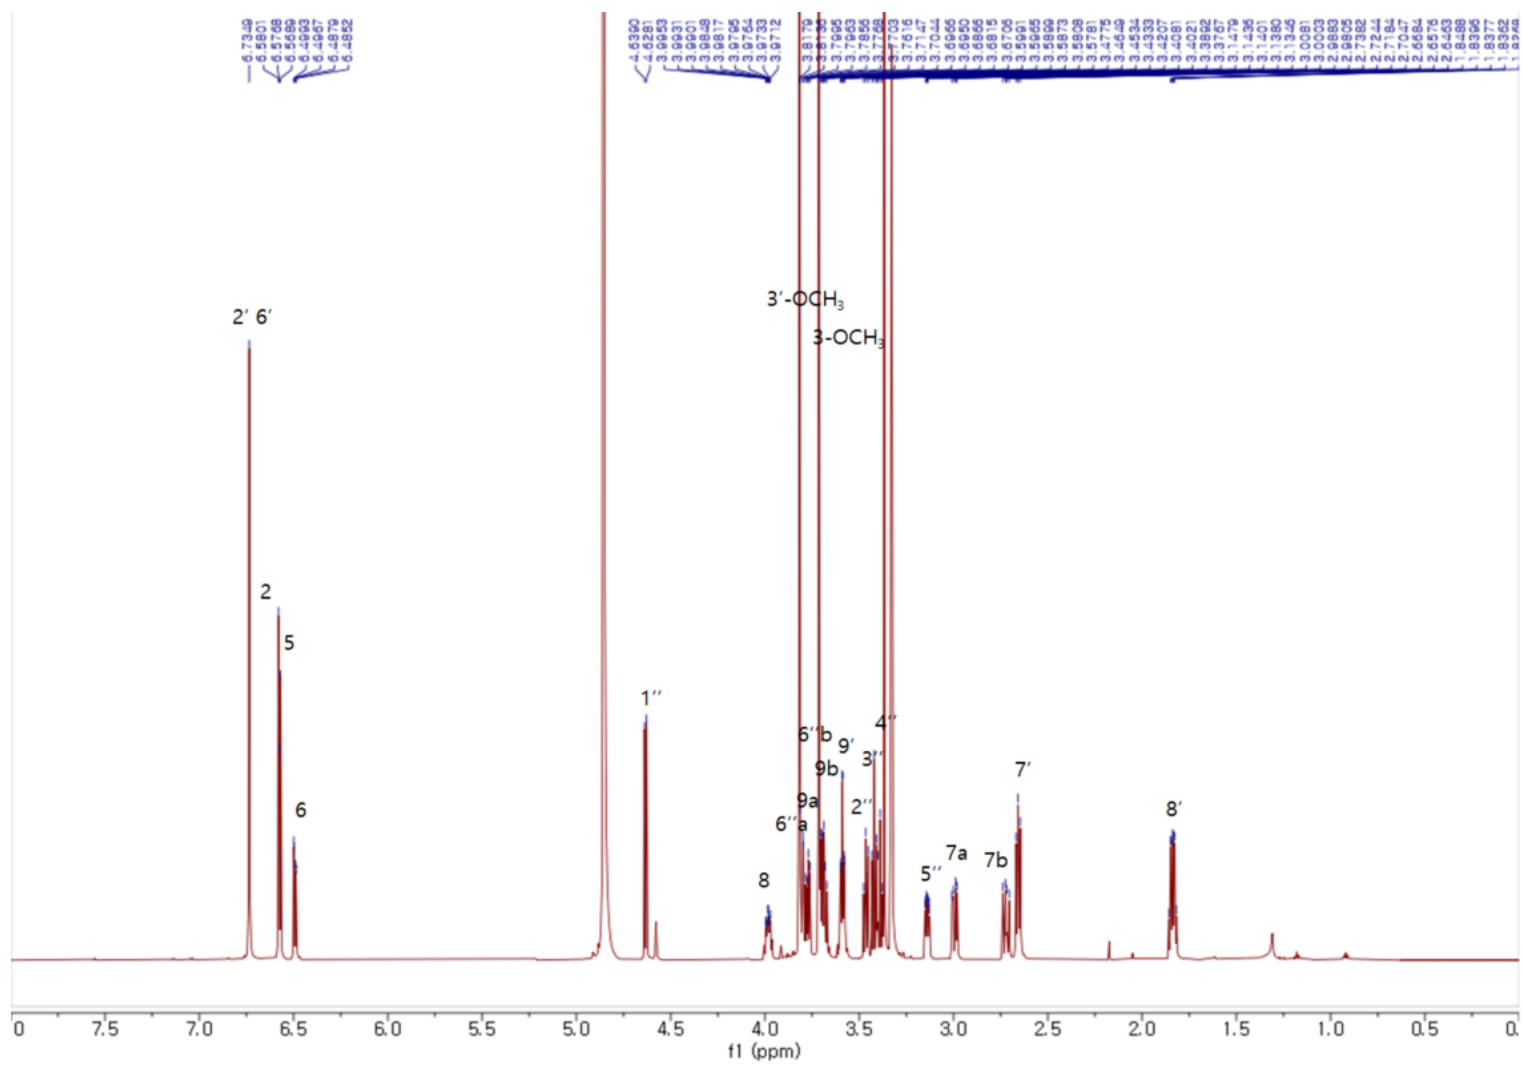

**Figure S17**  $^1\text{H}$  NMR data of **3** ( $\text{CD}_3\text{OD}$ , 700 MHz)

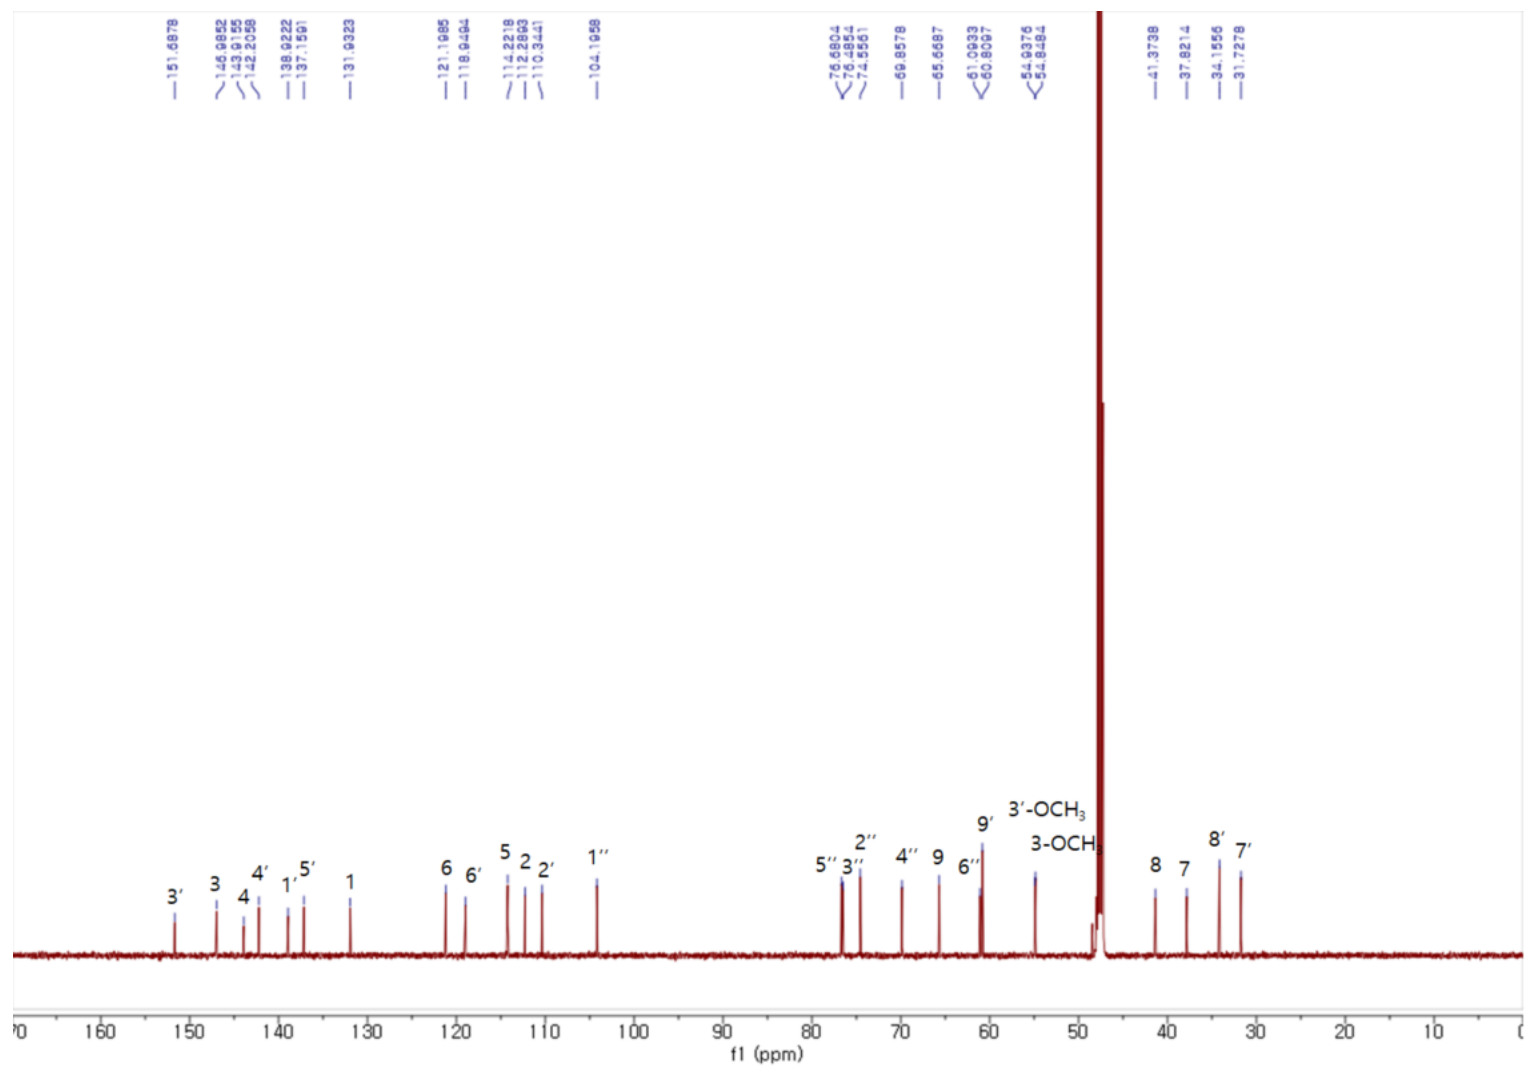

**Figure S18**  $^{13}\text{C}$  NMR data of **3** ( $\text{CD}_3\text{OD}$ , 175 MHz)

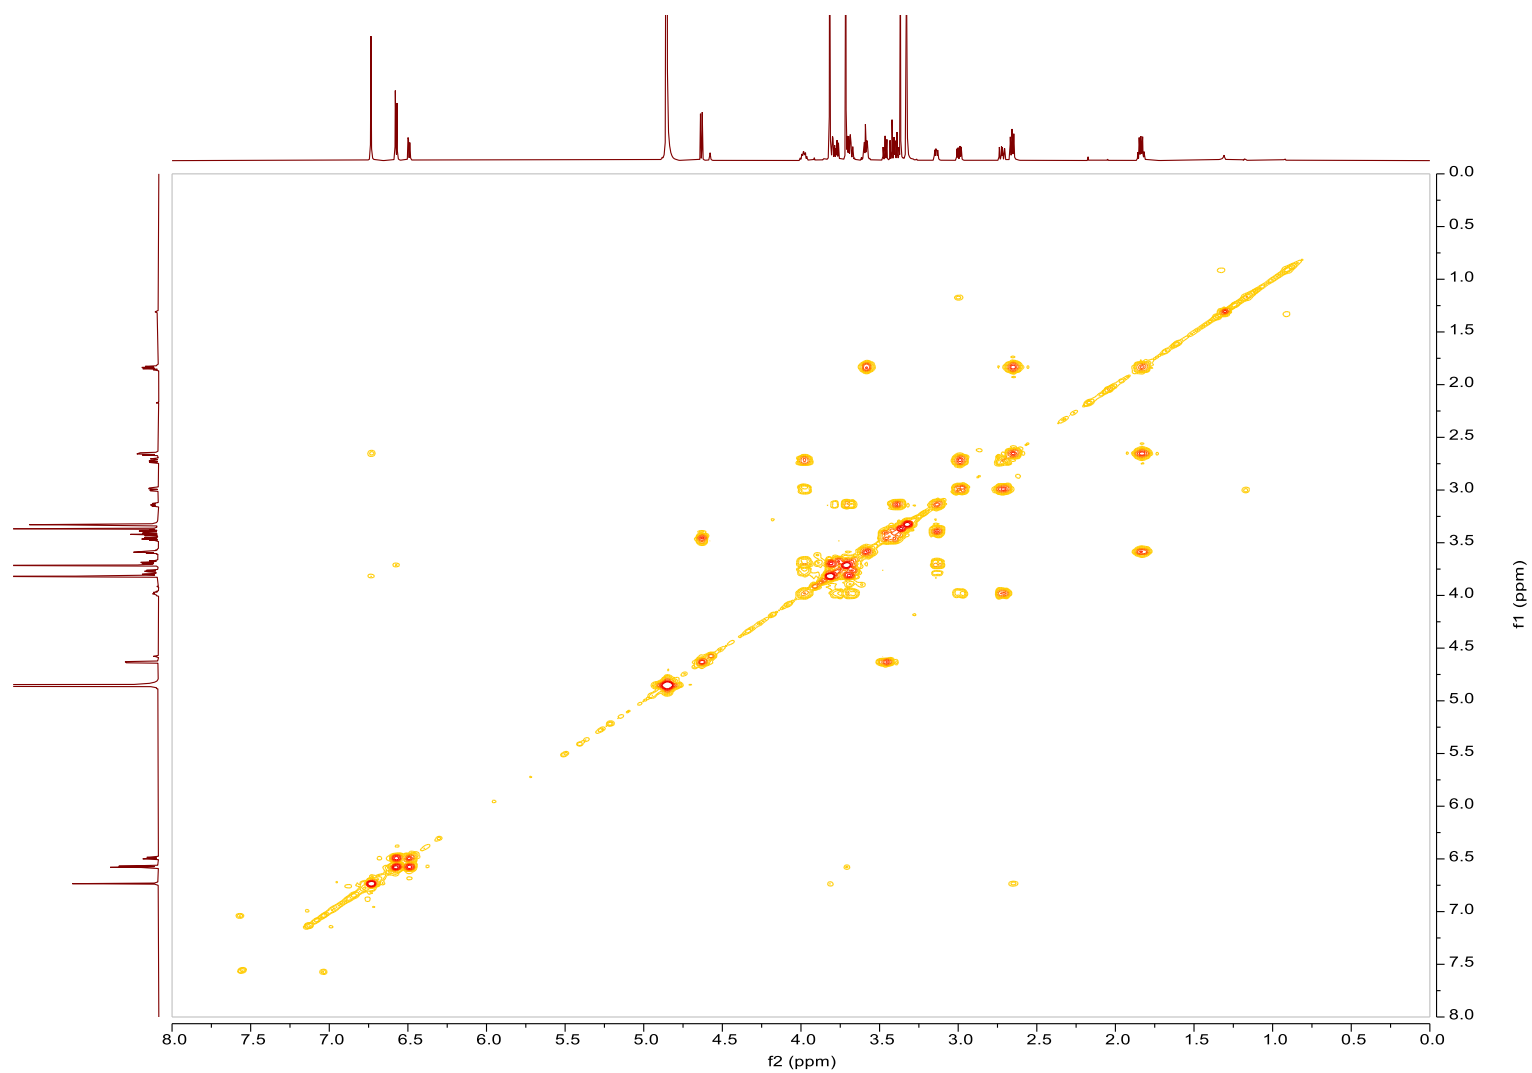

**Figure S19**  $^1\text{H}$ - $^1\text{H}$  COSY data of **3** ( $\text{CD}_3\text{OD}$ )

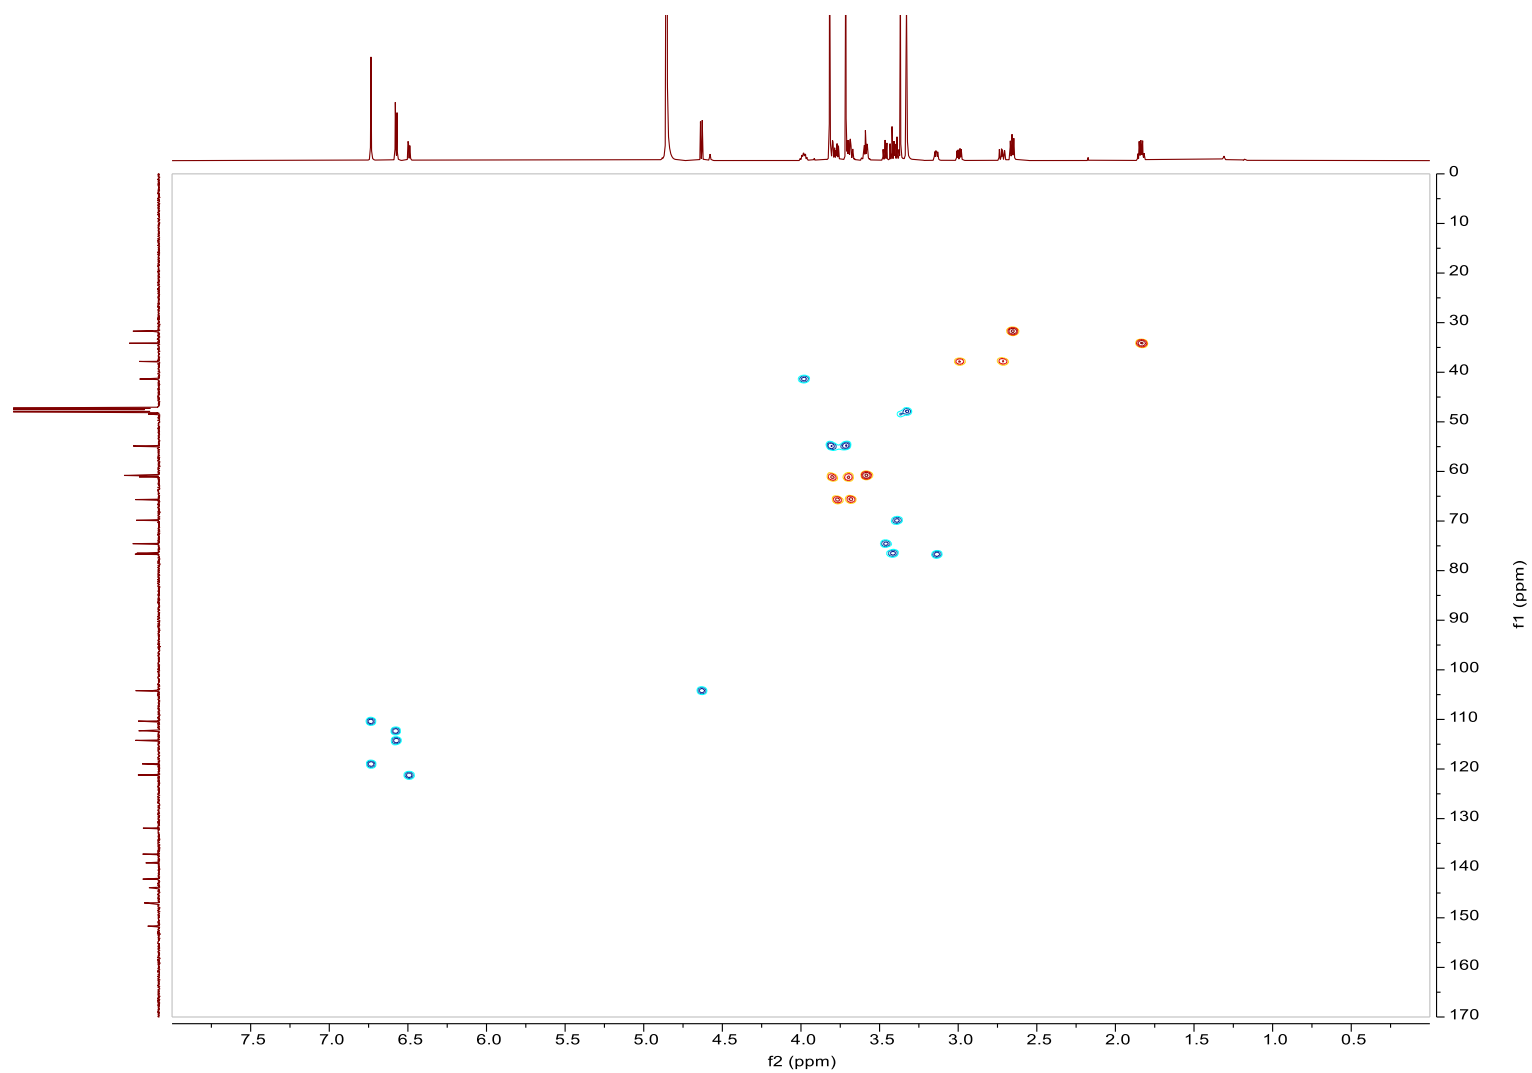

**Figure S20** HSQC data of **3** (CD<sub>3</sub>OD)

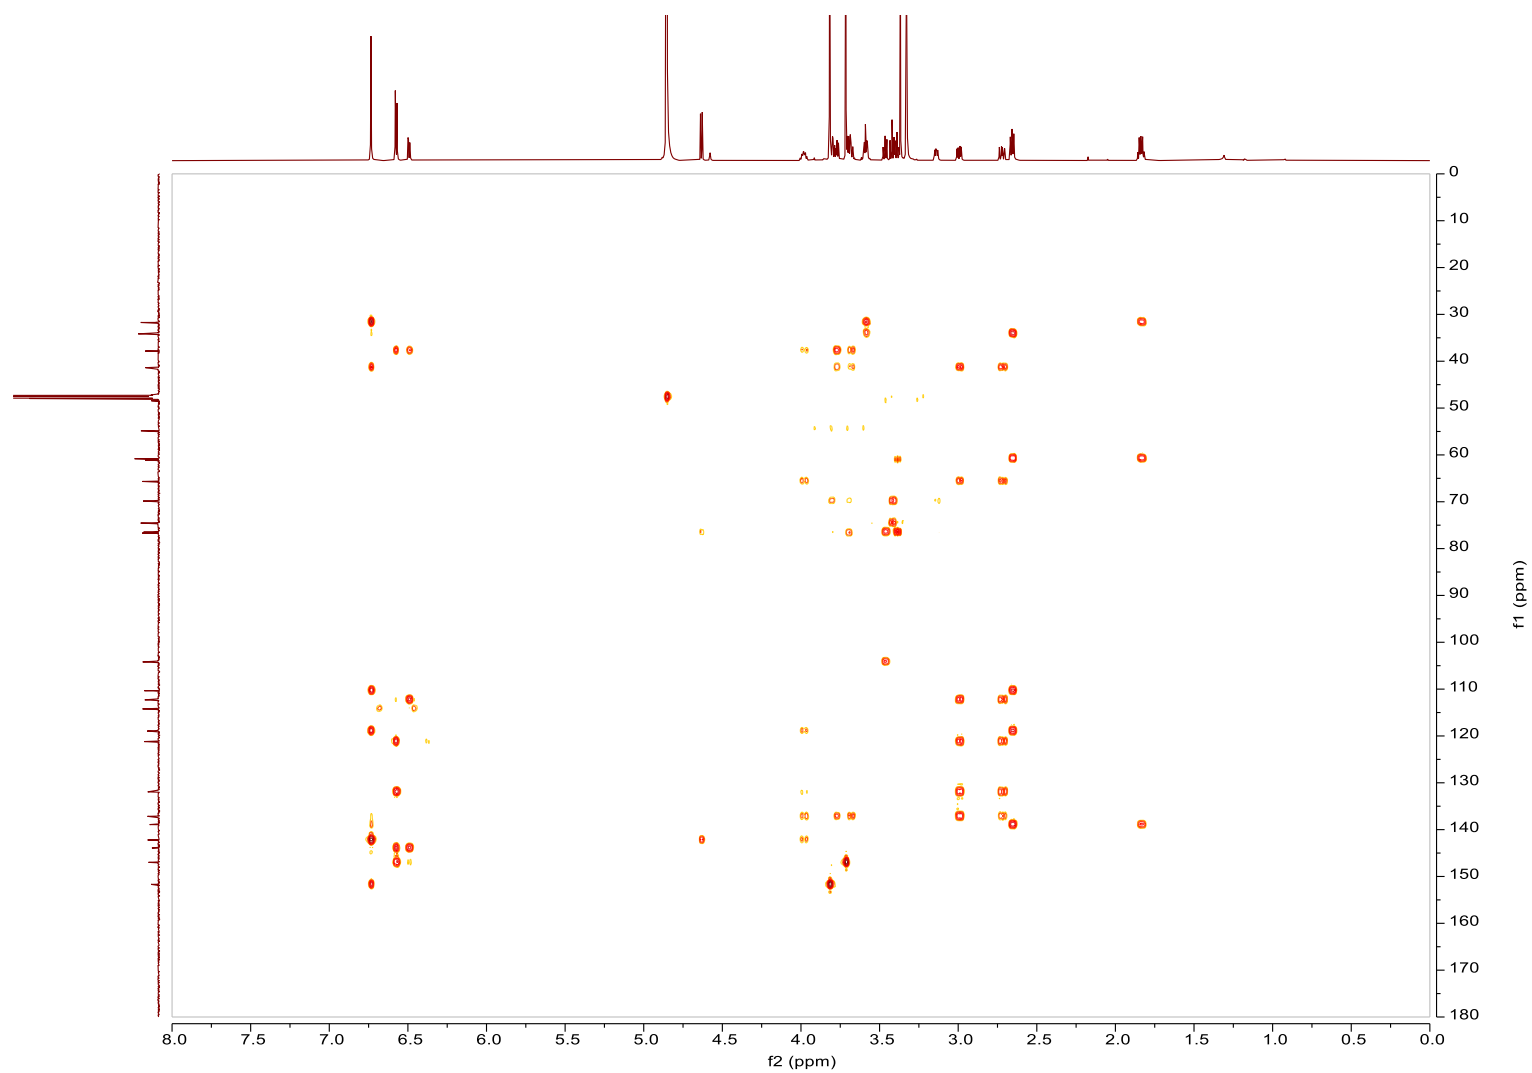

**Figure S21** HMBC data of **3** (CD<sub>3</sub>OD)

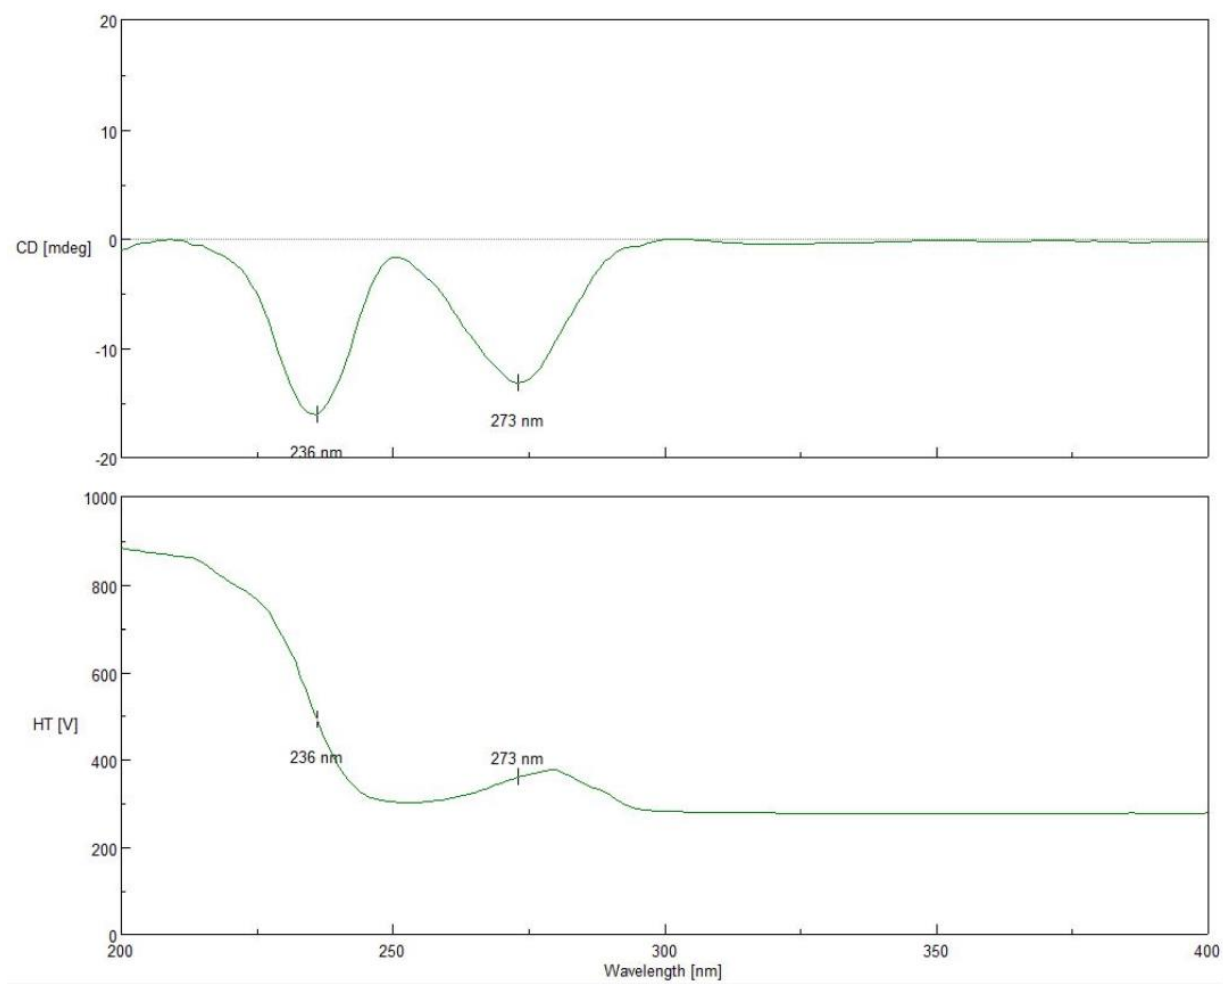

**Figure S22** ECD data of **3**

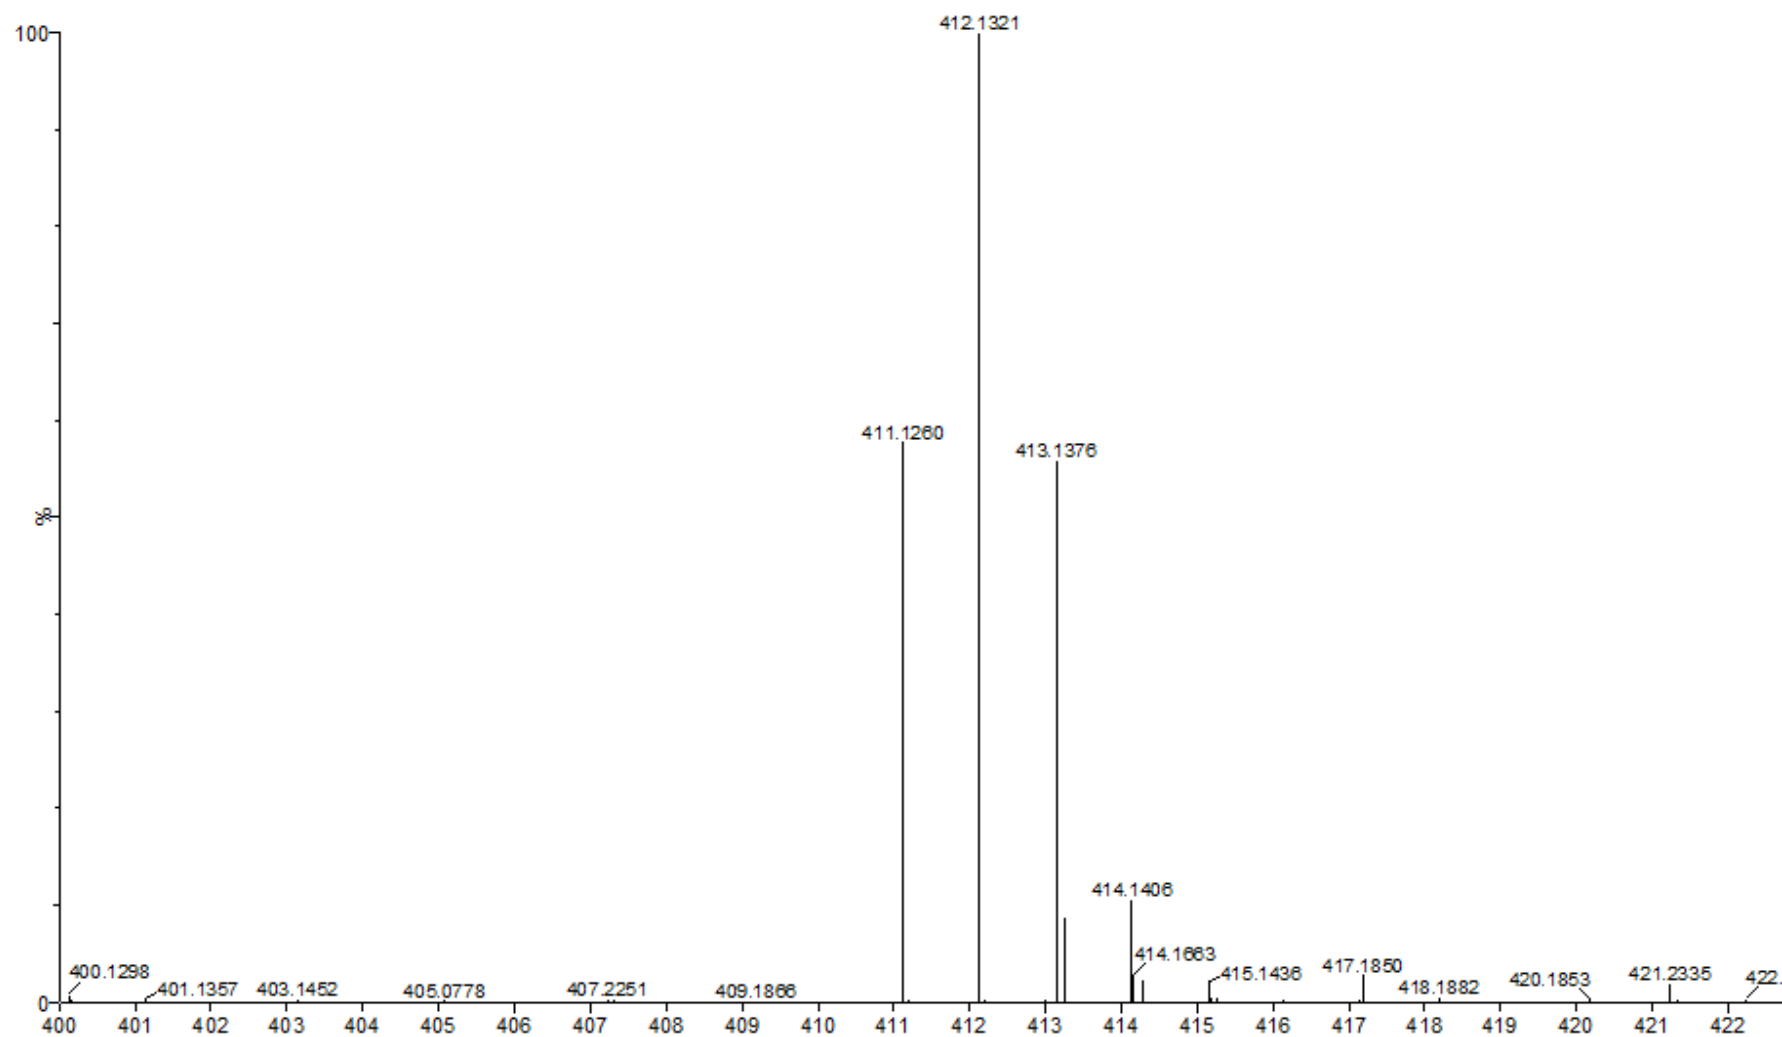

**Figure S23** HRESIMS data of **15**

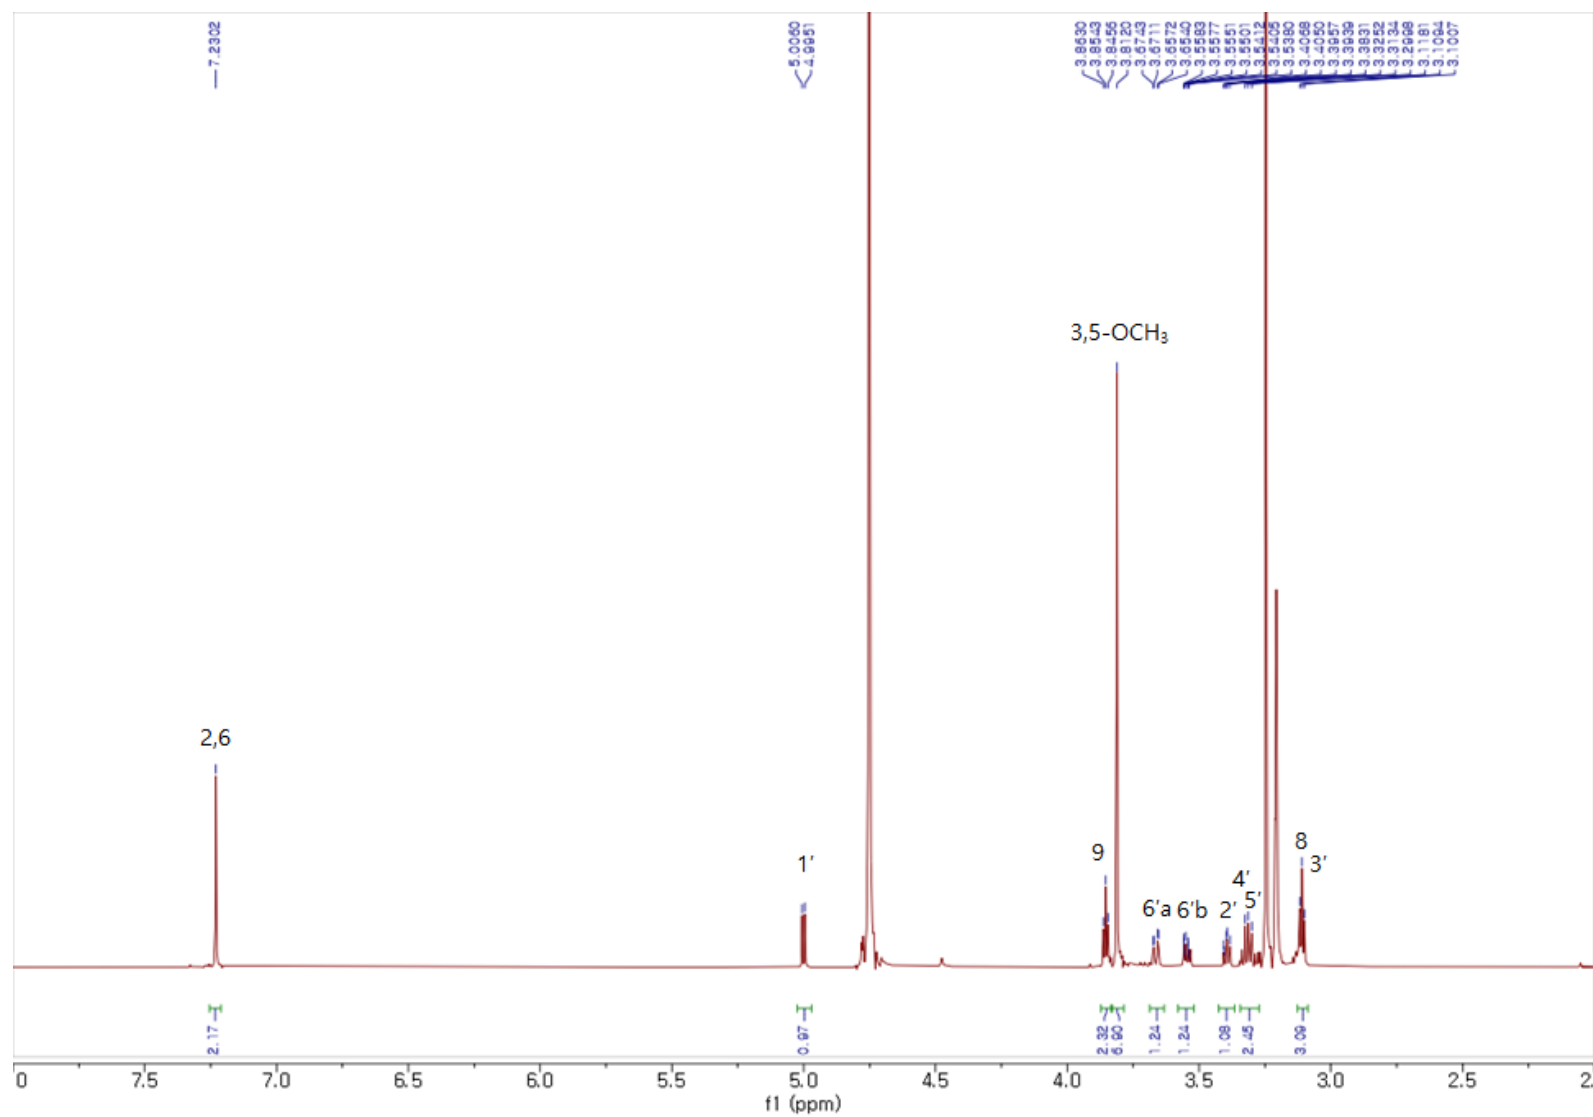

**Figure S24**  $^1\text{H}$  NMR data of **15** ( $\text{CD}_3\text{OD}$ , 700 MHz)

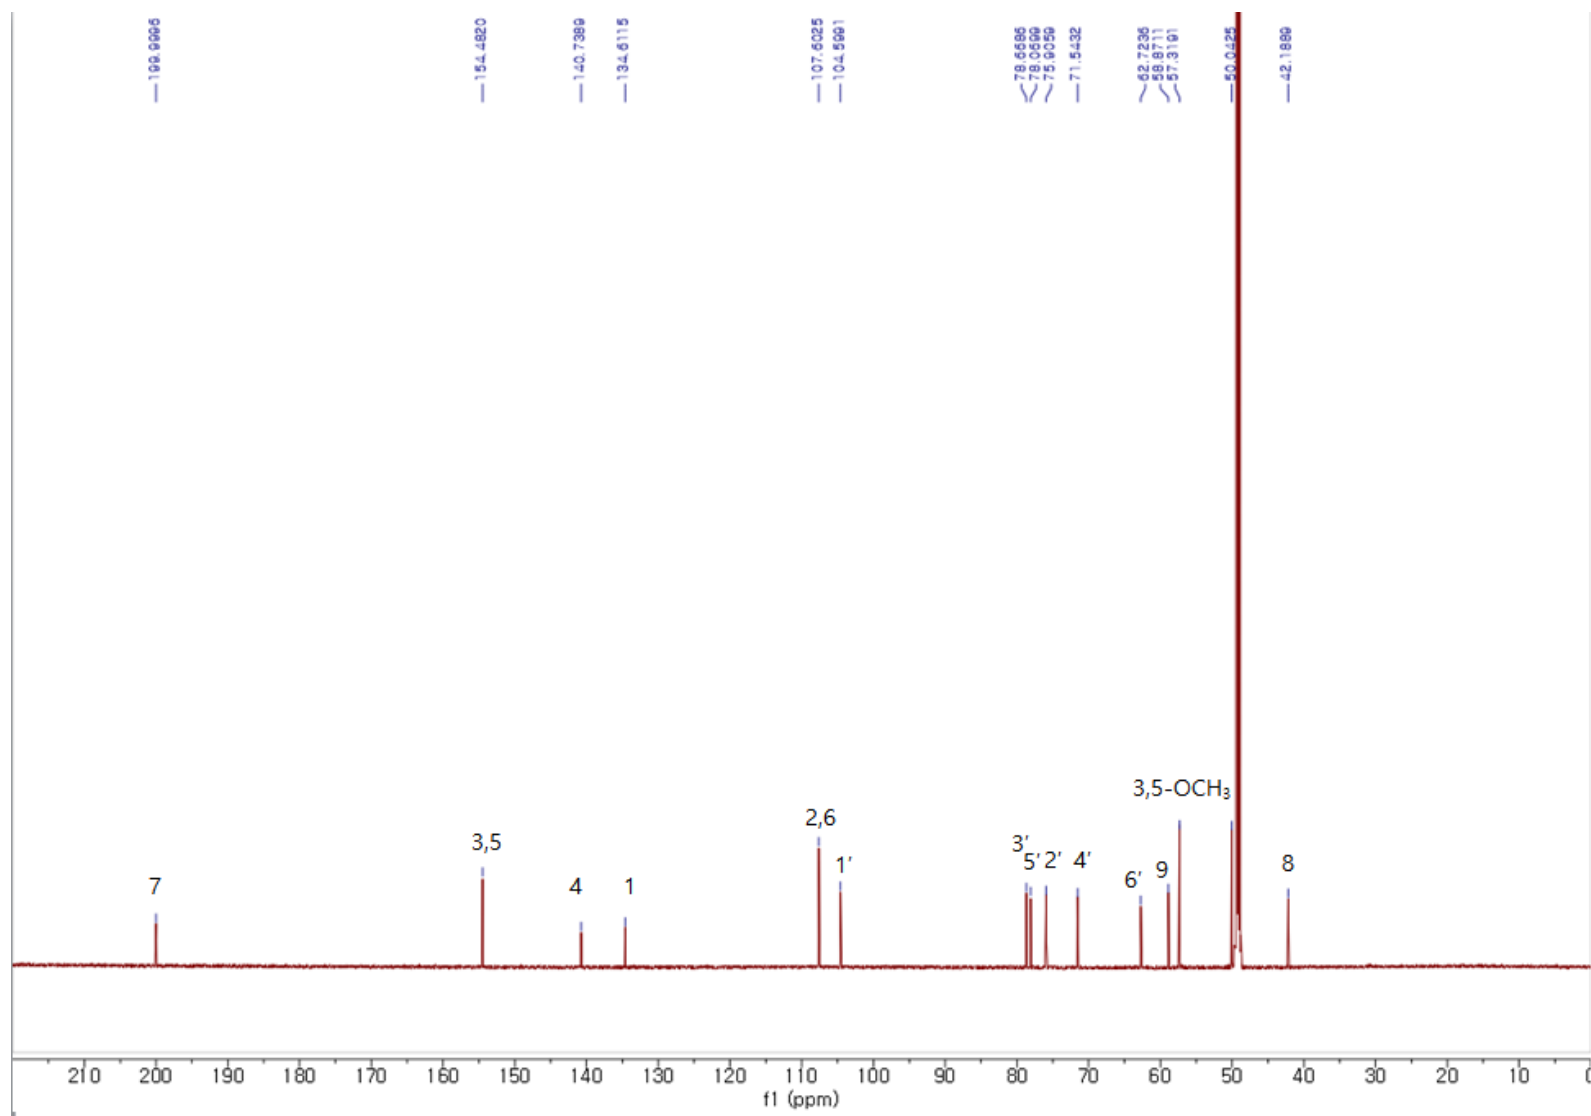

**Figure S25**  $^{13}\text{C}$  NMR data of **15** ( $\text{CD}_3\text{OD}$ , 175 MHz)

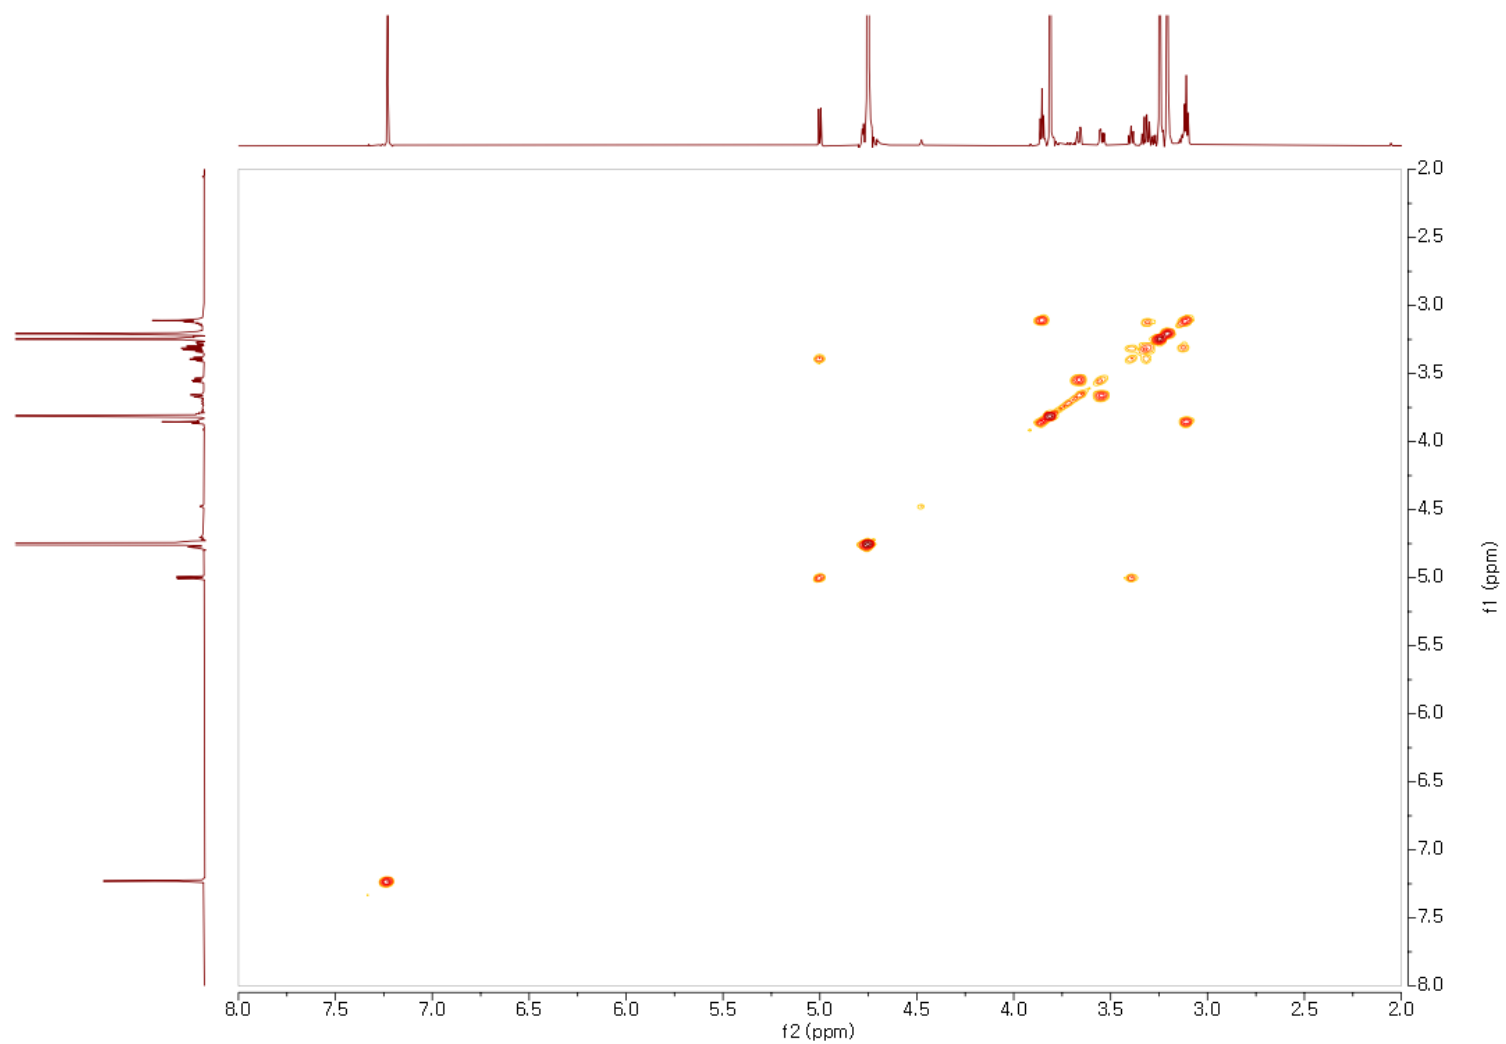

**Figure S26**  $^1\text{H}$ - $^1\text{H}$  COSY data of **15** ( $\text{CD}_3\text{OD}$ )

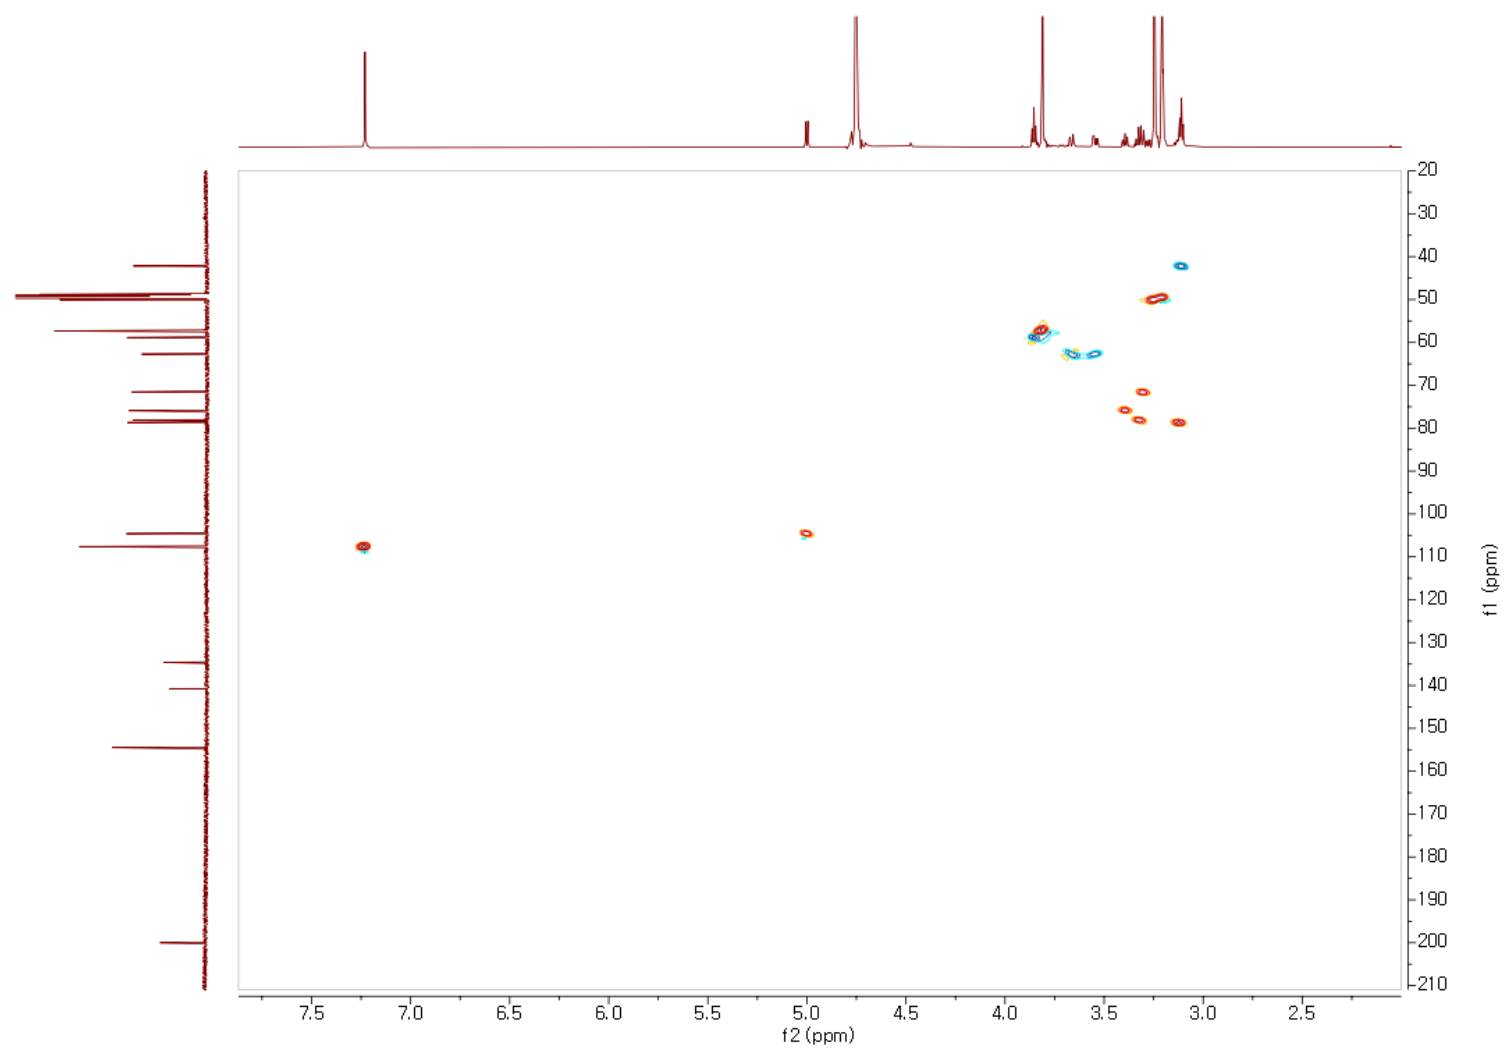

**Figure S27** HSQC data of **15** (CD<sub>3</sub>OD)

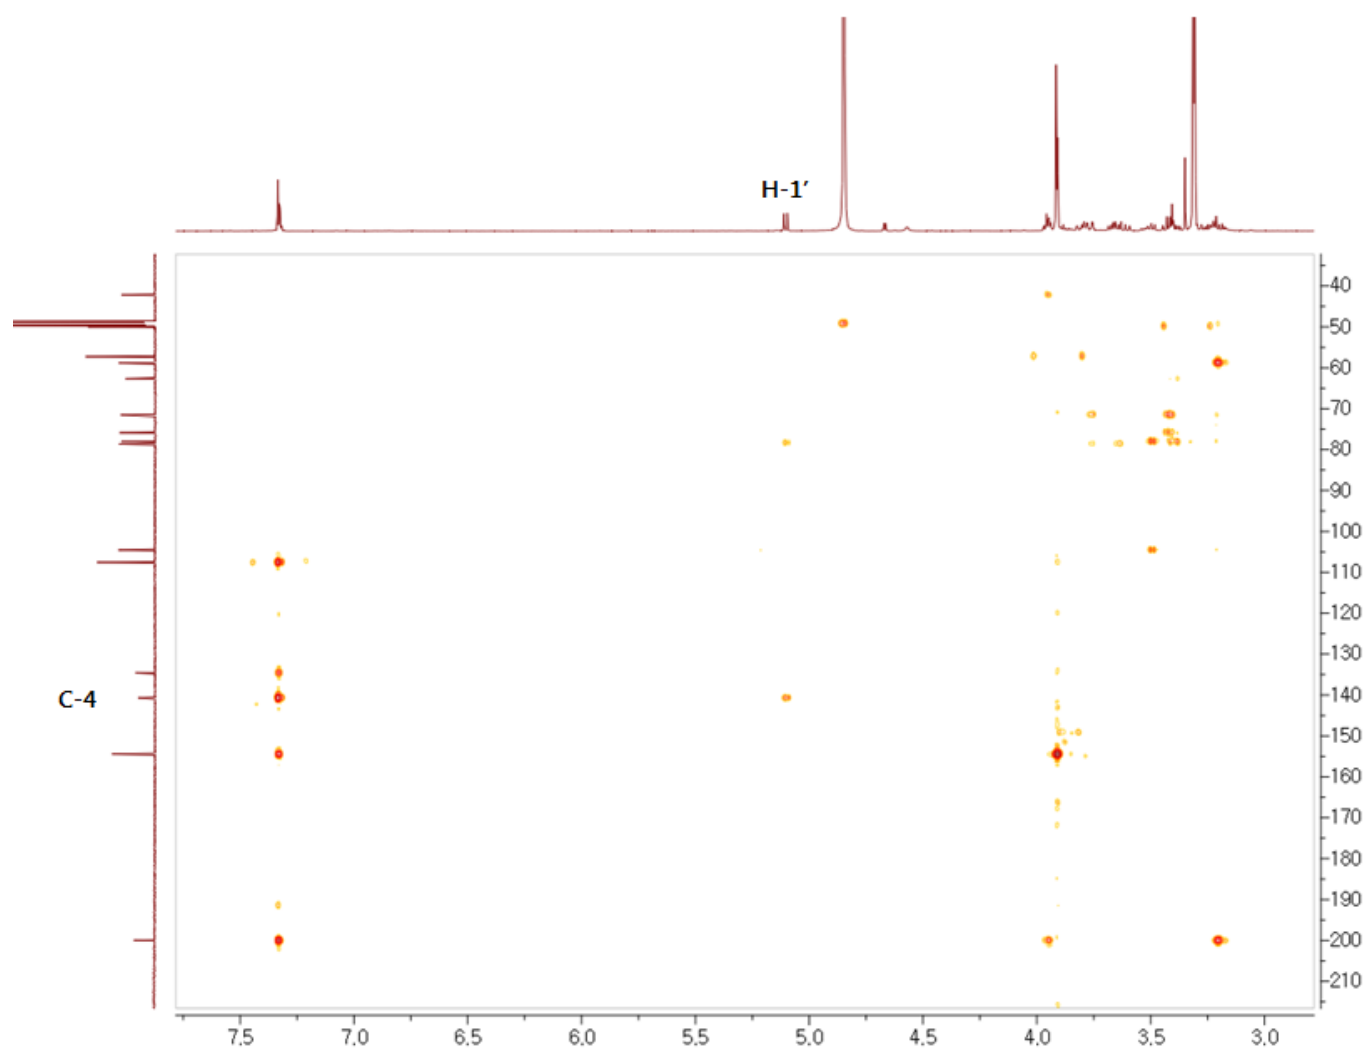

**Figure S28** HMBC data of **15** (CD<sub>3</sub>OD)

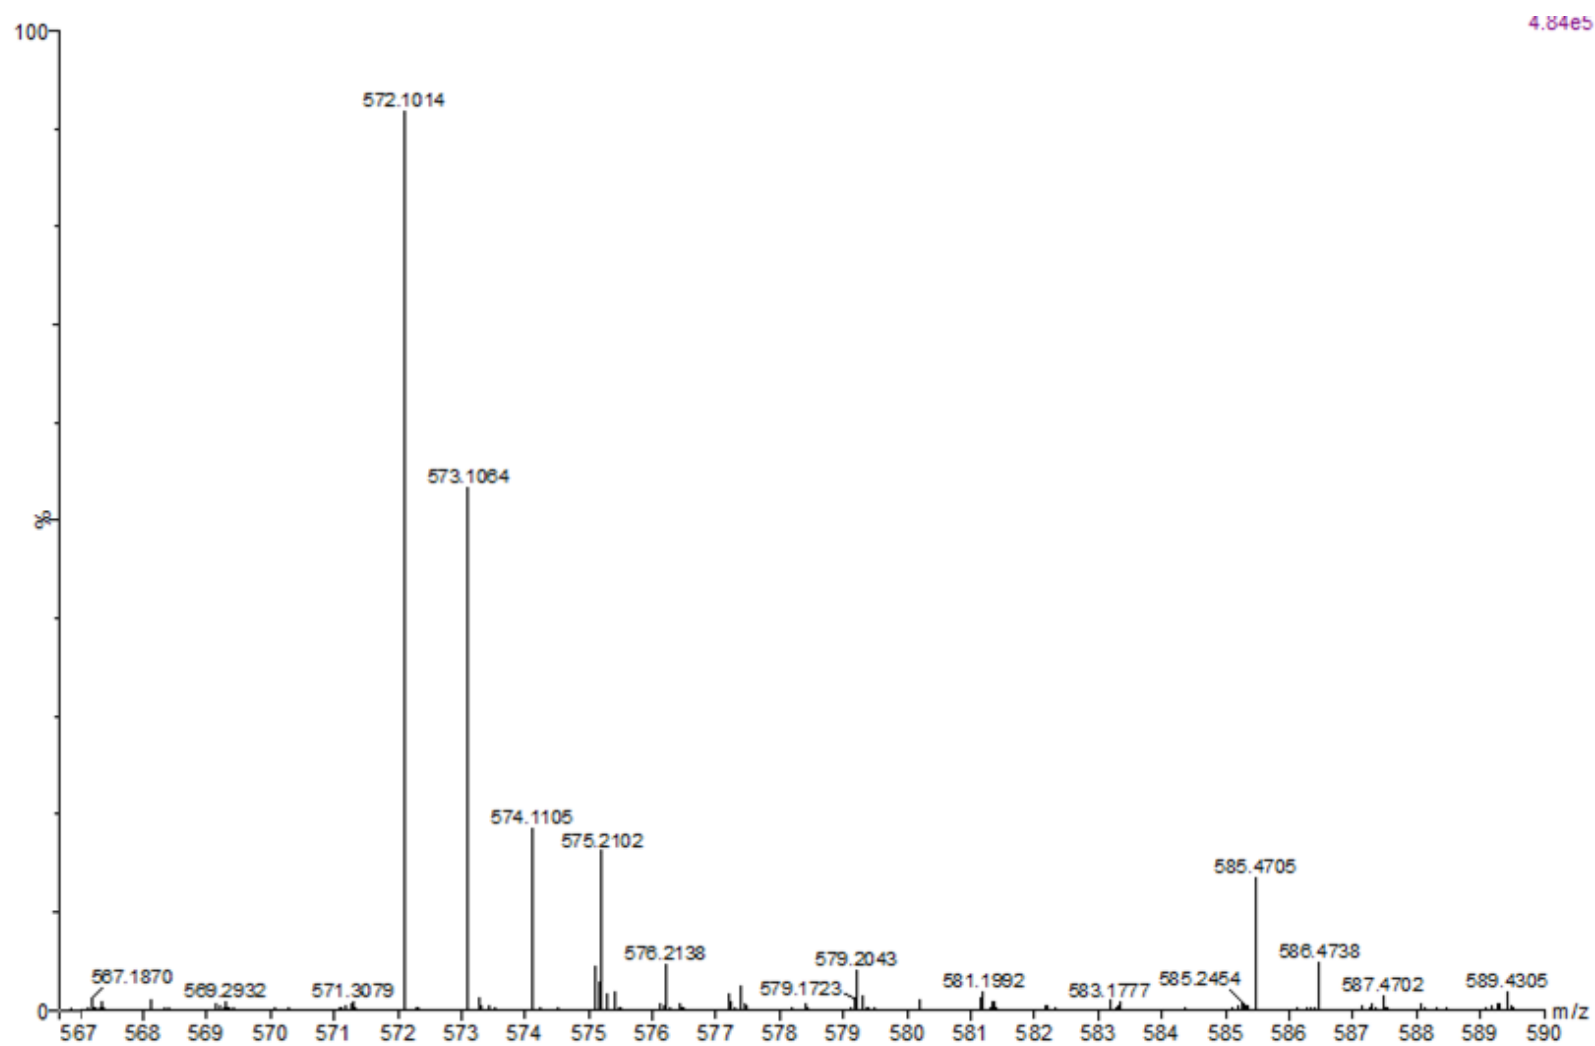

**Figure S29** HRESIMS data of **16**

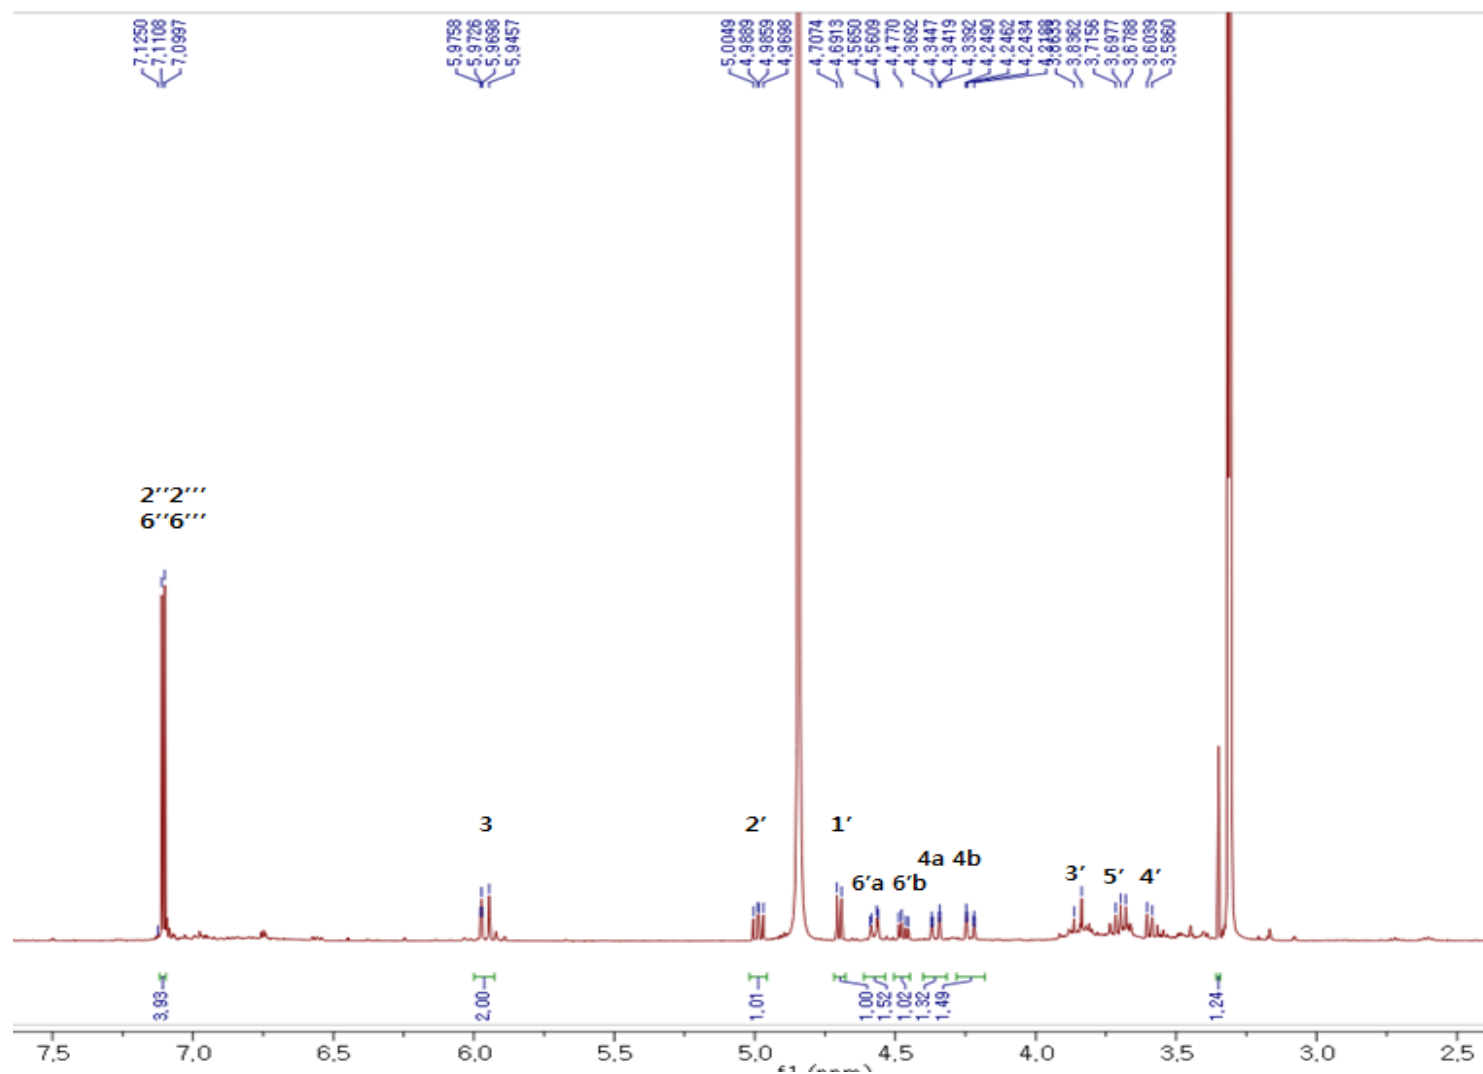

**Figure S30**  $^1\text{H}$  NMR data of **16** ( $\text{CD}_3\text{OD}$ , 500 MHz)

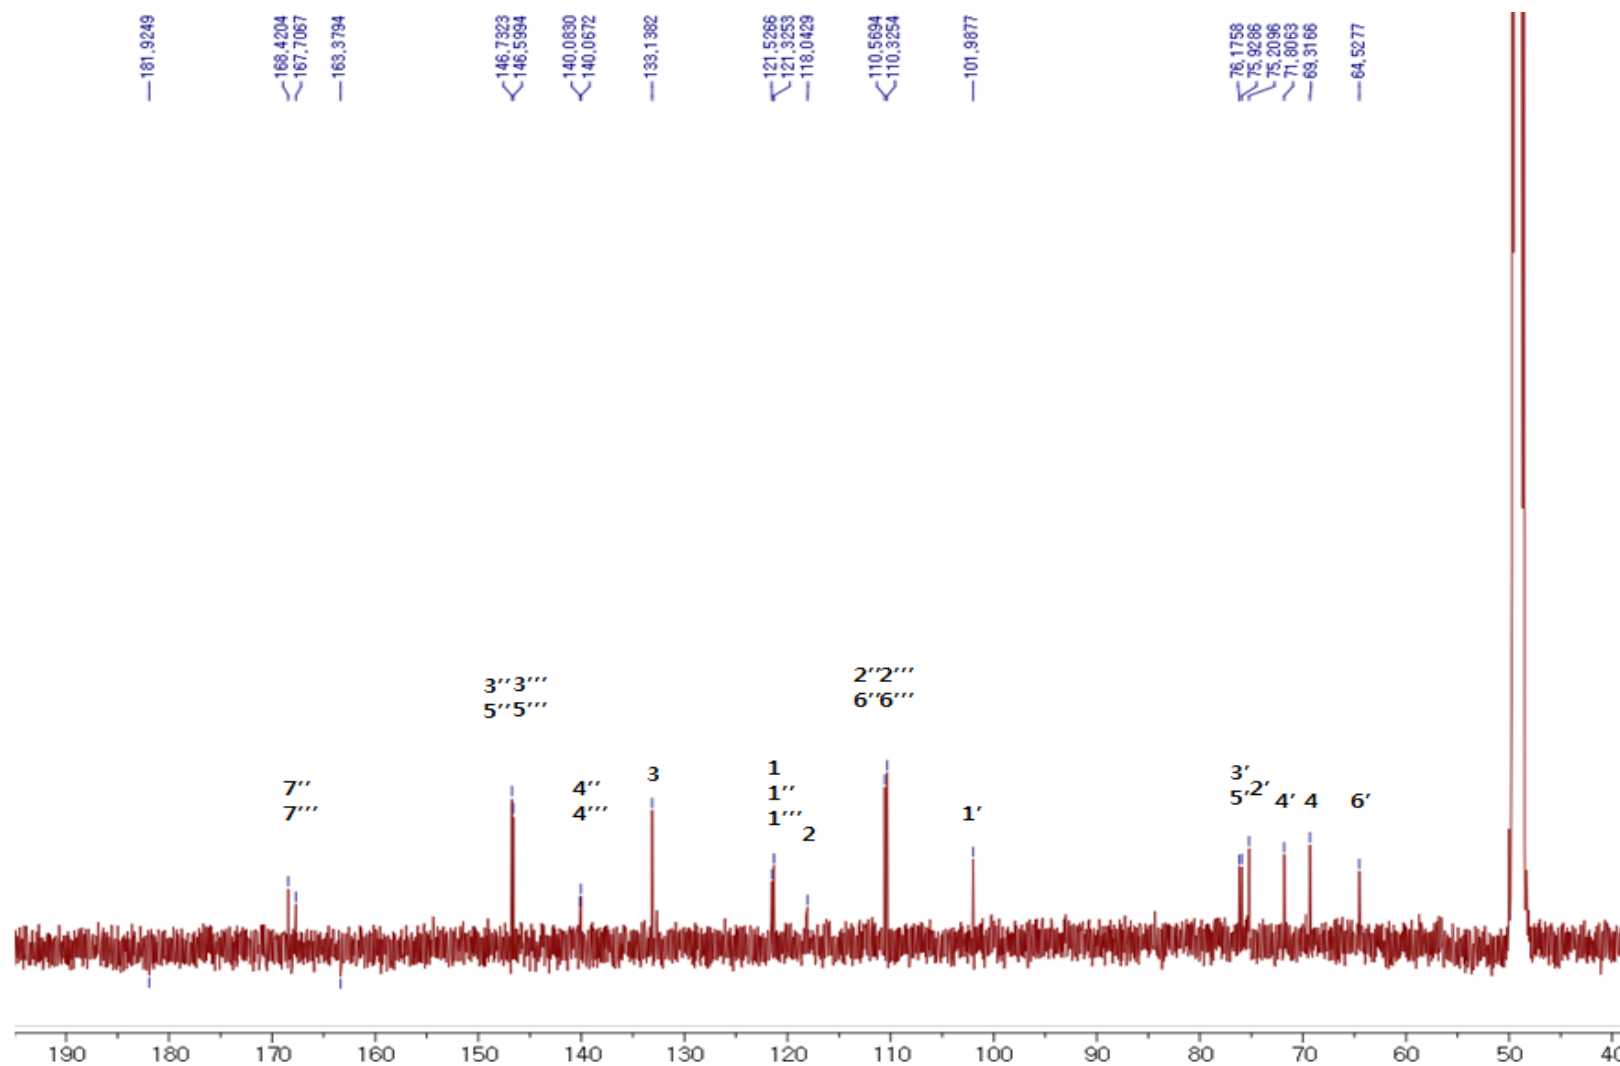

**Figure S31**  $^{13}\text{C}$  NMR data of **16** ( $\text{CD}_3\text{OD}$ , 125 MHz)

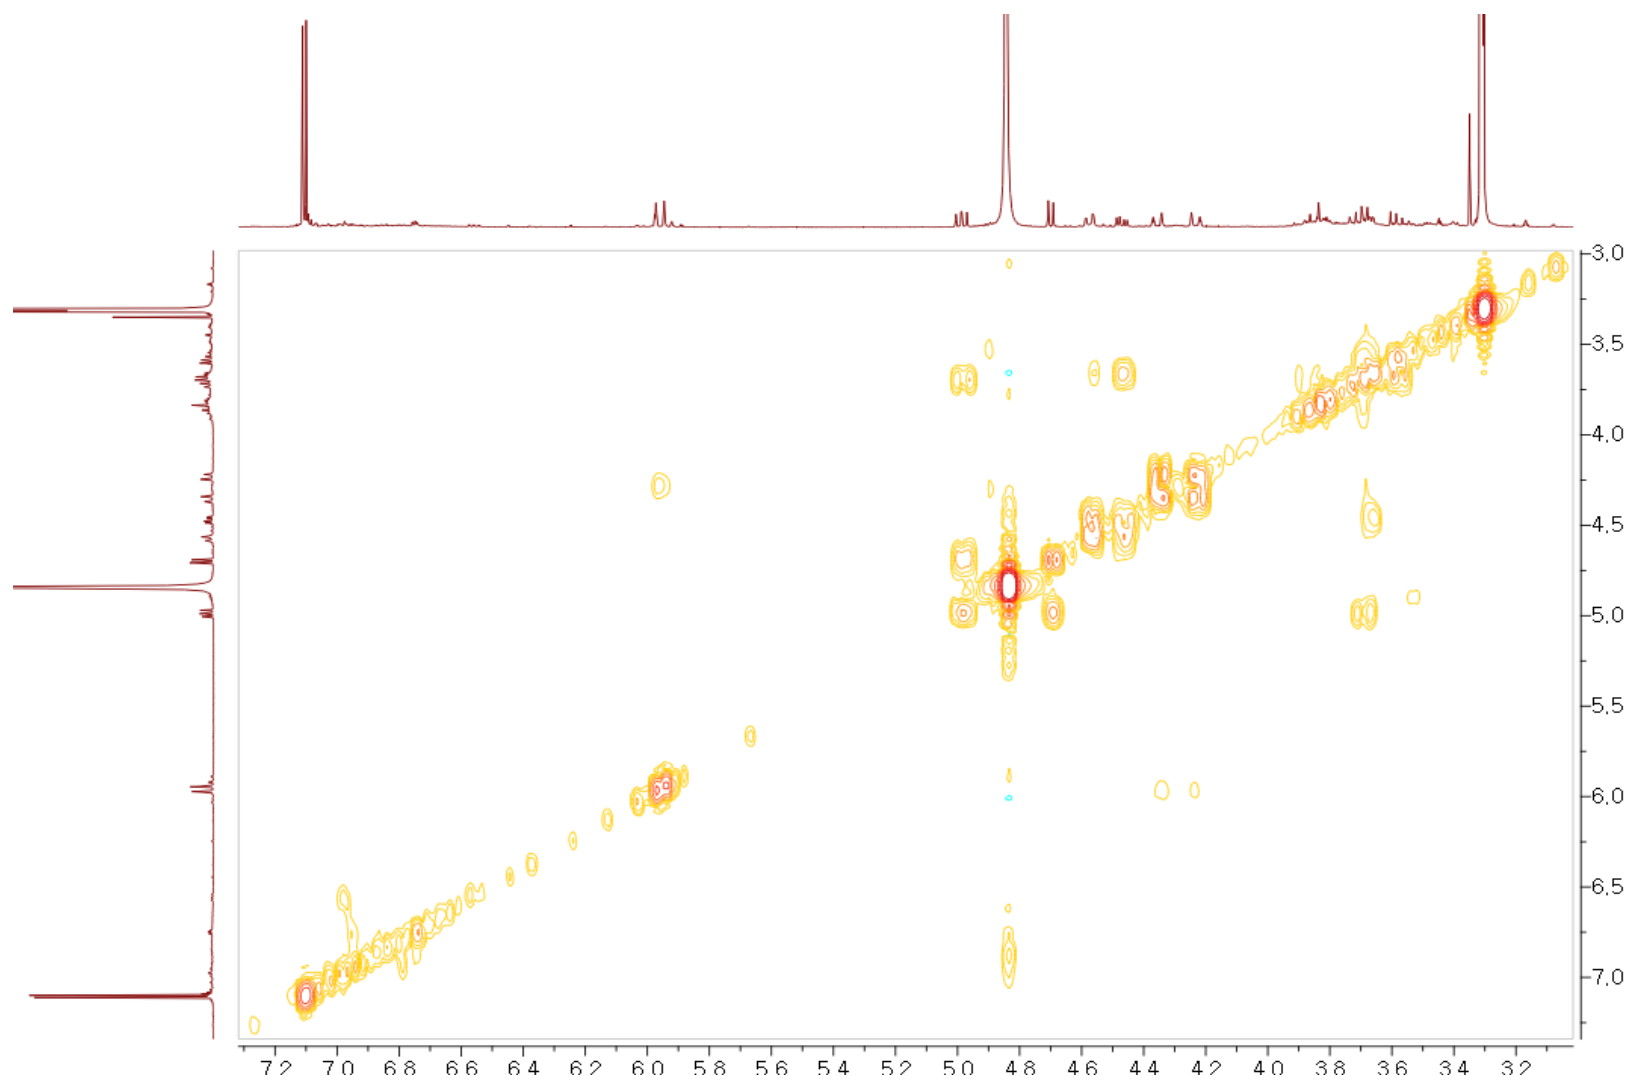

**Figure S32**  $^1\text{H}$ - $^1\text{H}$  COSY data of **16** ( $\text{CD}_3\text{OD}$ )

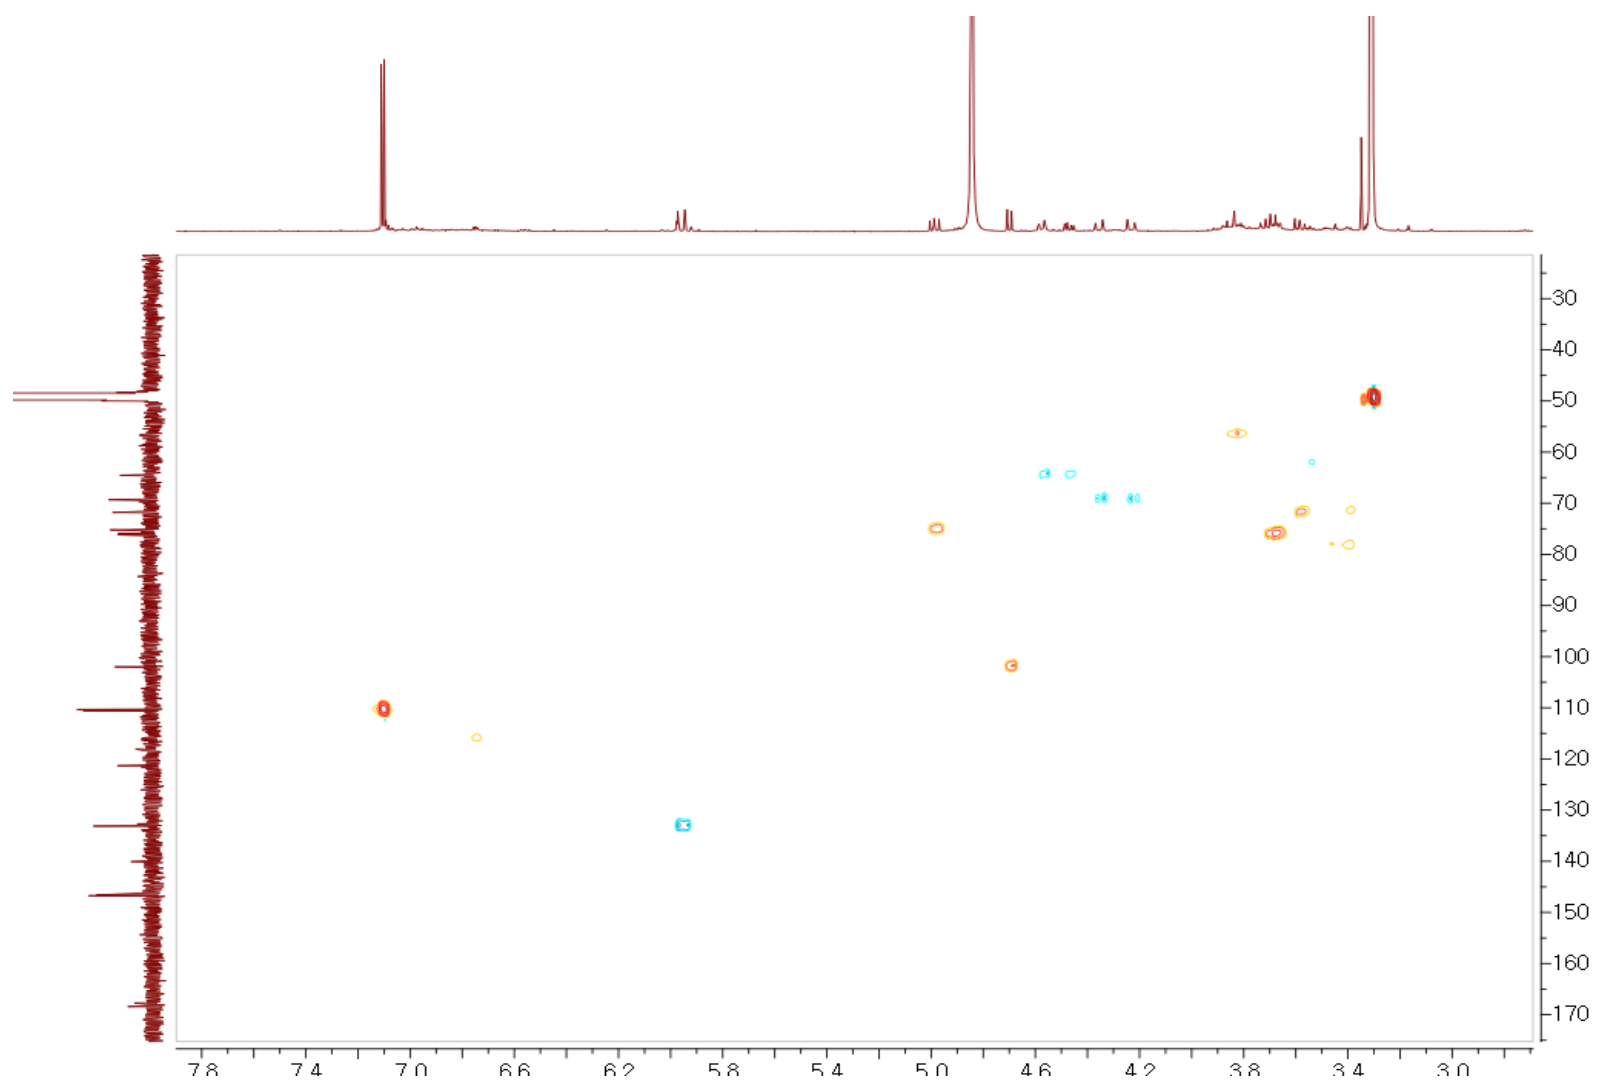

**Figure S33** HSQC data of **16** (CD<sub>3</sub>OD)

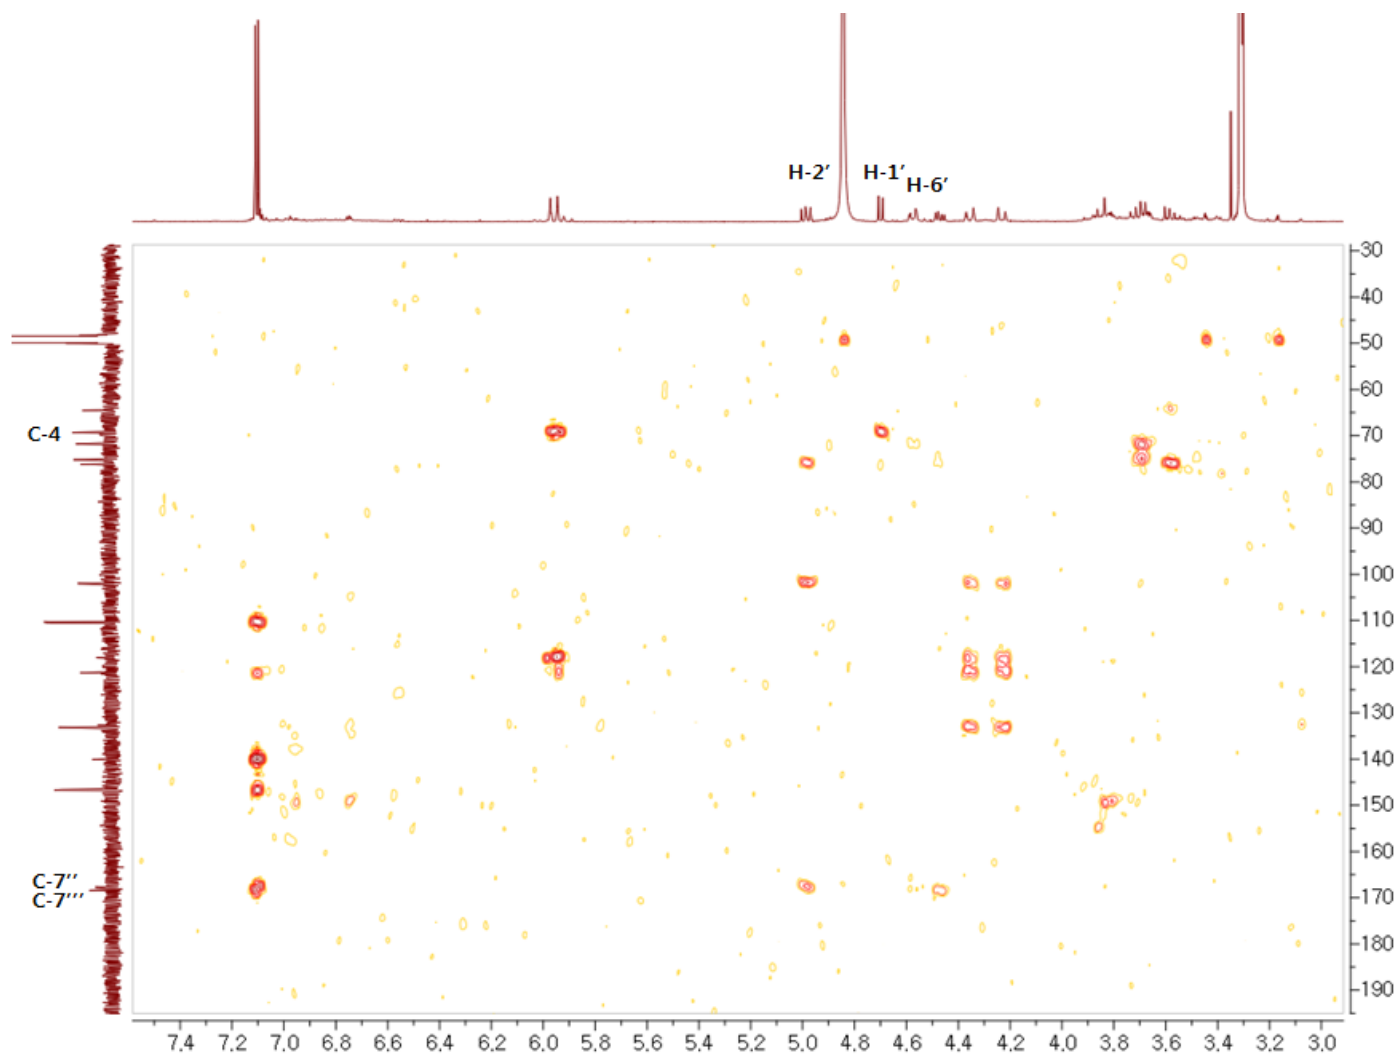

**Figure S34** HMBC data of **16** (CD<sub>3</sub>OD)
